# Supplementary material for: Copper-catalyzed multi-component synthesis of acrylamidines and benzoimidazoles
Source: Royal Society of Chemistry journal article supplement (doi:10.1039/c5qo00196j), 2015-01-01

## Supporting Information

*For*

### Copper-Catalyzed Multi-Component Synthesis of Acrylamidines and Benzoimidazoles

Jinjin Wang, Ping Lu\* and Yanguang Wang\*

Department of Chemistry, Zhejiang University, Hangzhou 310027, P. R. China

### Contents

**Figure S1-S18**  $^1\text{H}$  NMR and  $^{13}\text{C}$  NMR of **4a-4r** -----S2-S19

**Figure S19-S29**  $^1\text{H}$  NMR and  $^{13}\text{C}$  NMR of **5a-1k**-----S20-S30

**Figure S1**  $^1\text{H}$  NMR and  $^{13}\text{C}$  NMR of **4a**

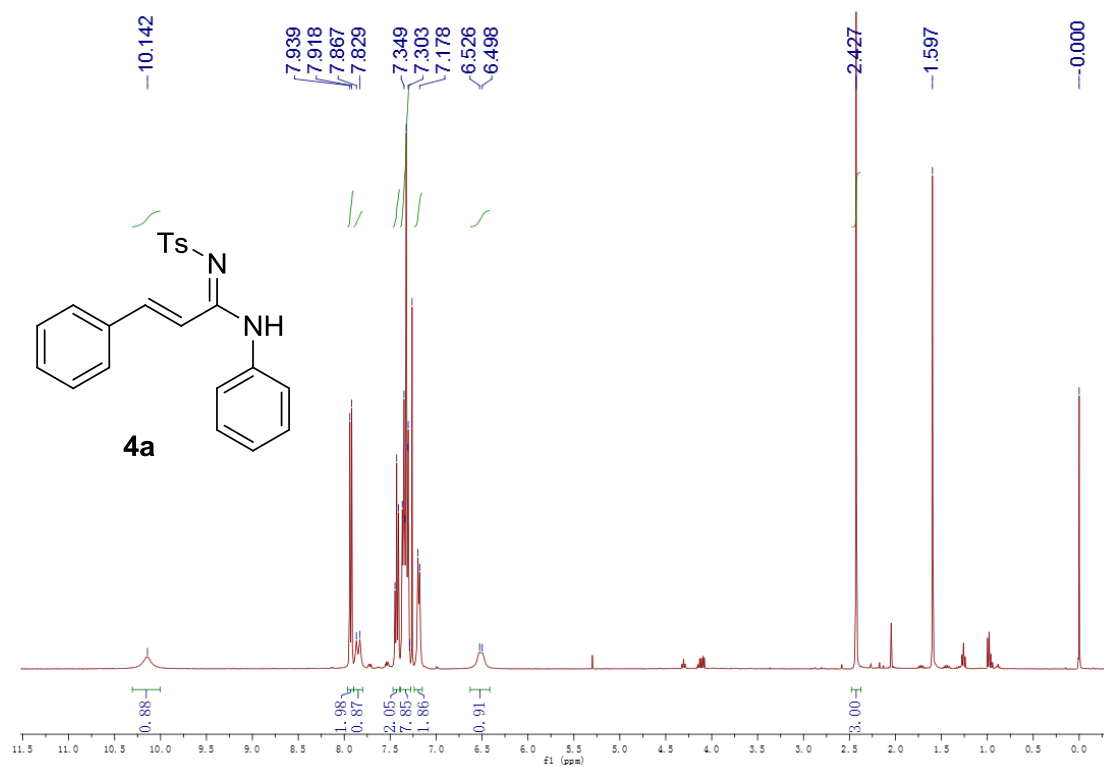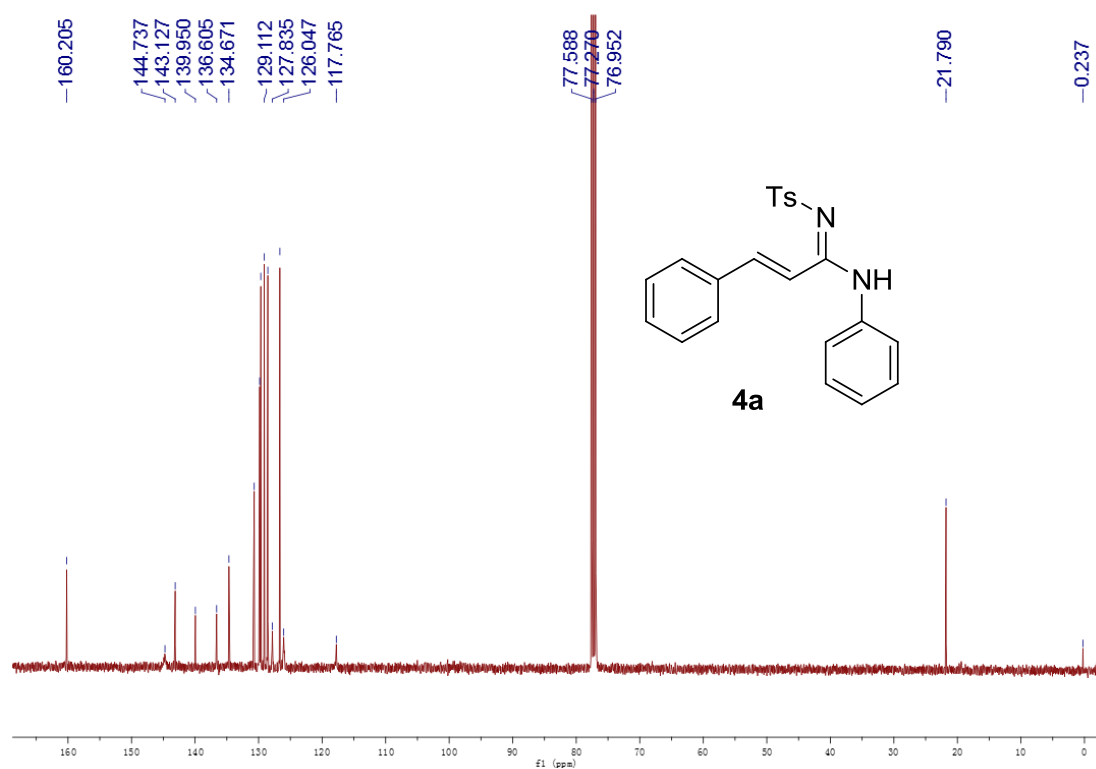

**Figure S2**  $^1\text{H}$  NMR and  $^{13}\text{C}$  NMR of **4b**

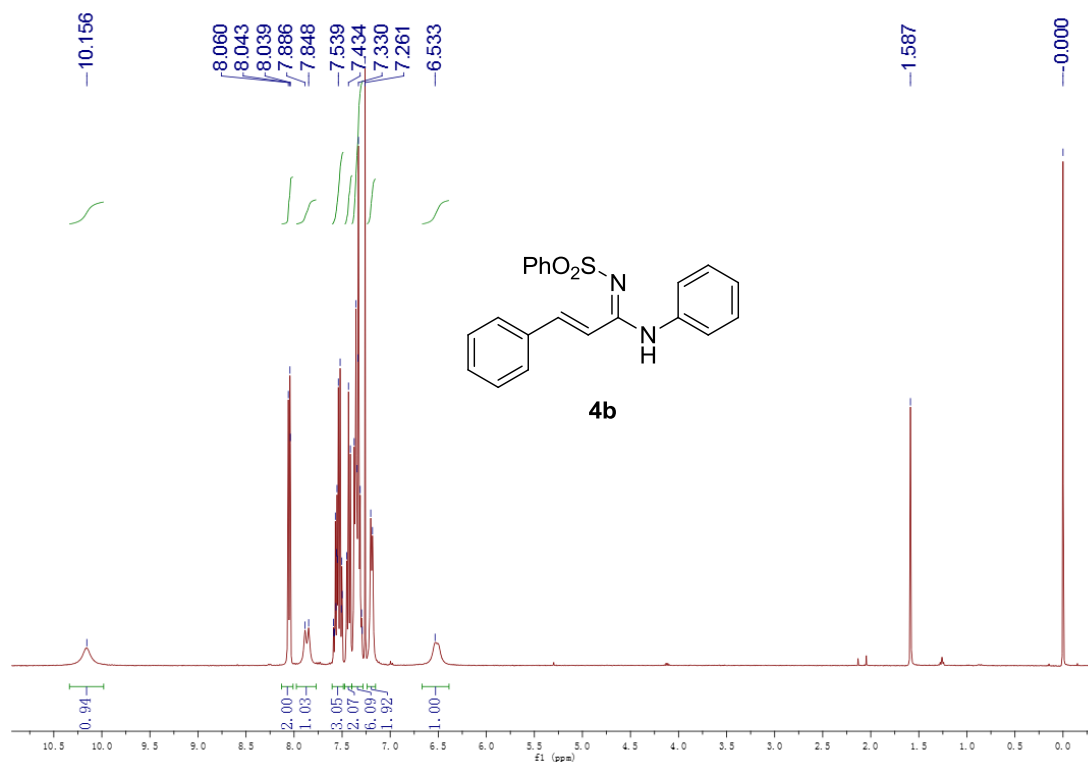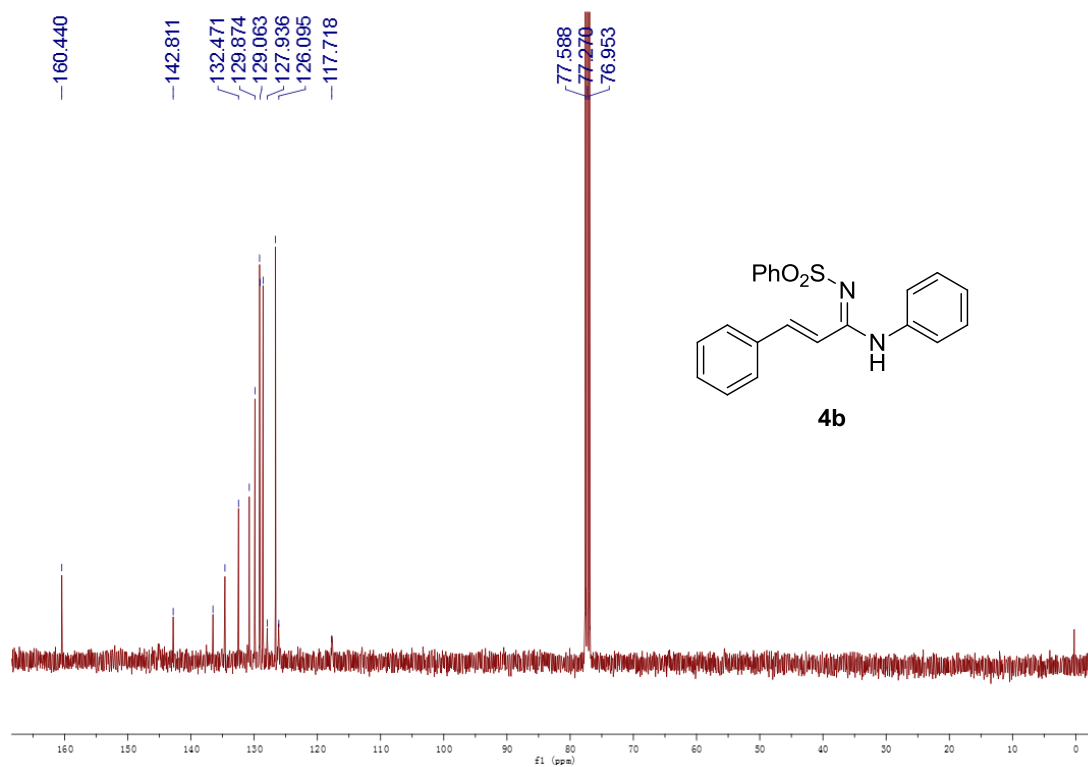

**Figure S3**  $^1\text{H}$  NMR and  $^{13}\text{C}$  NMR of **4c**

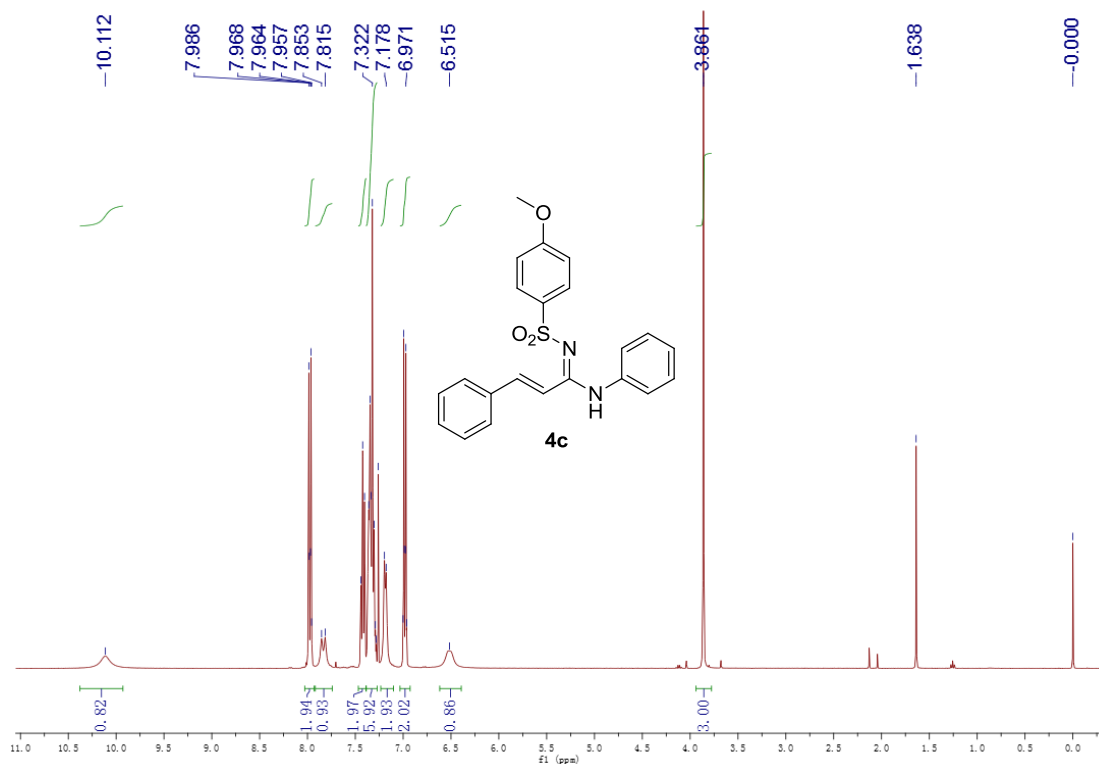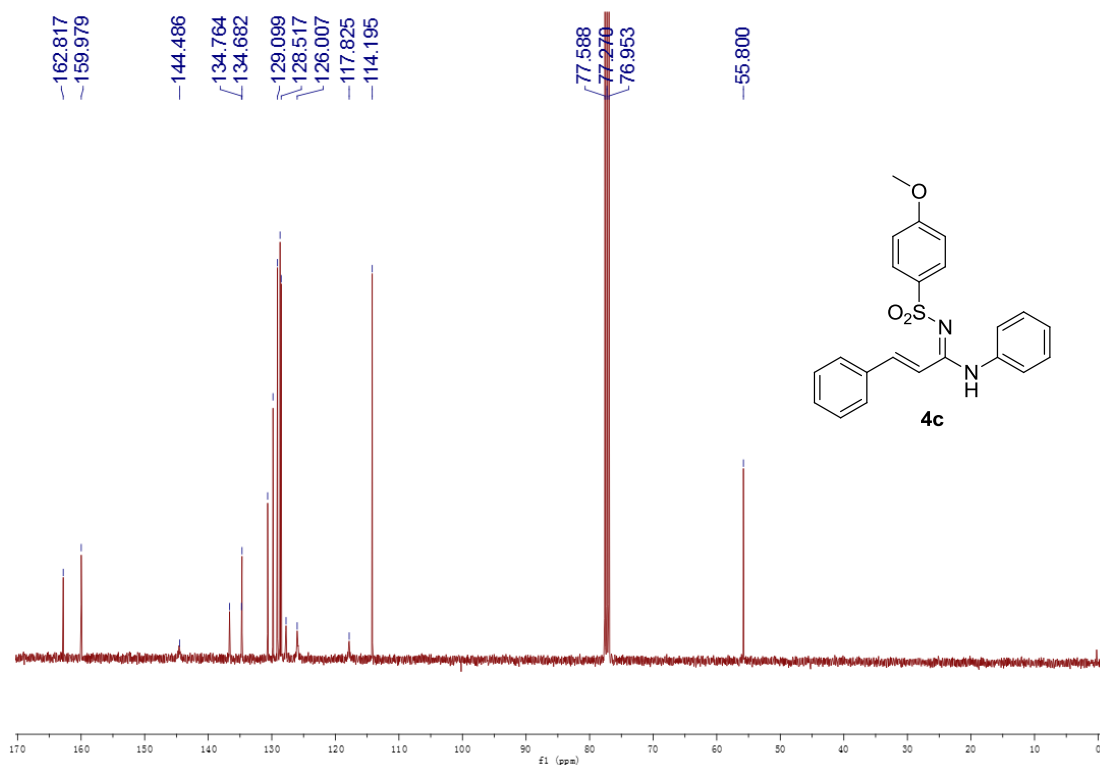

**Figure S4**  $^1\text{H}$  NMR and  $^{13}\text{C}$  NMR of **4d**

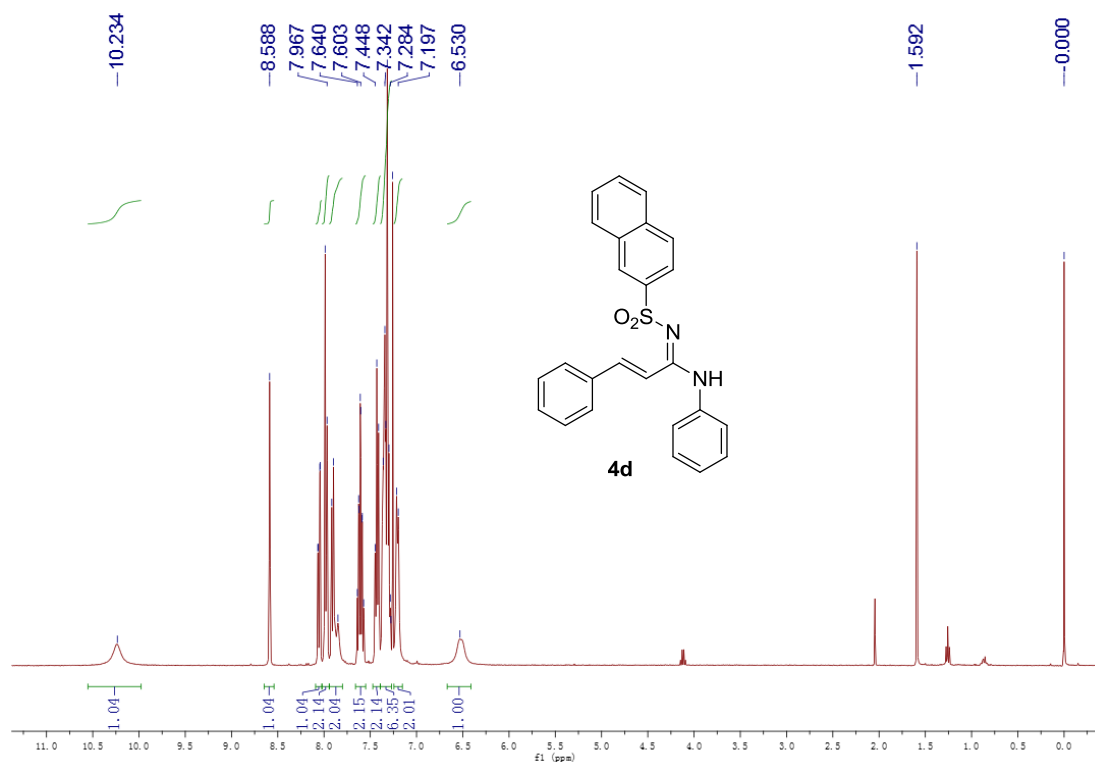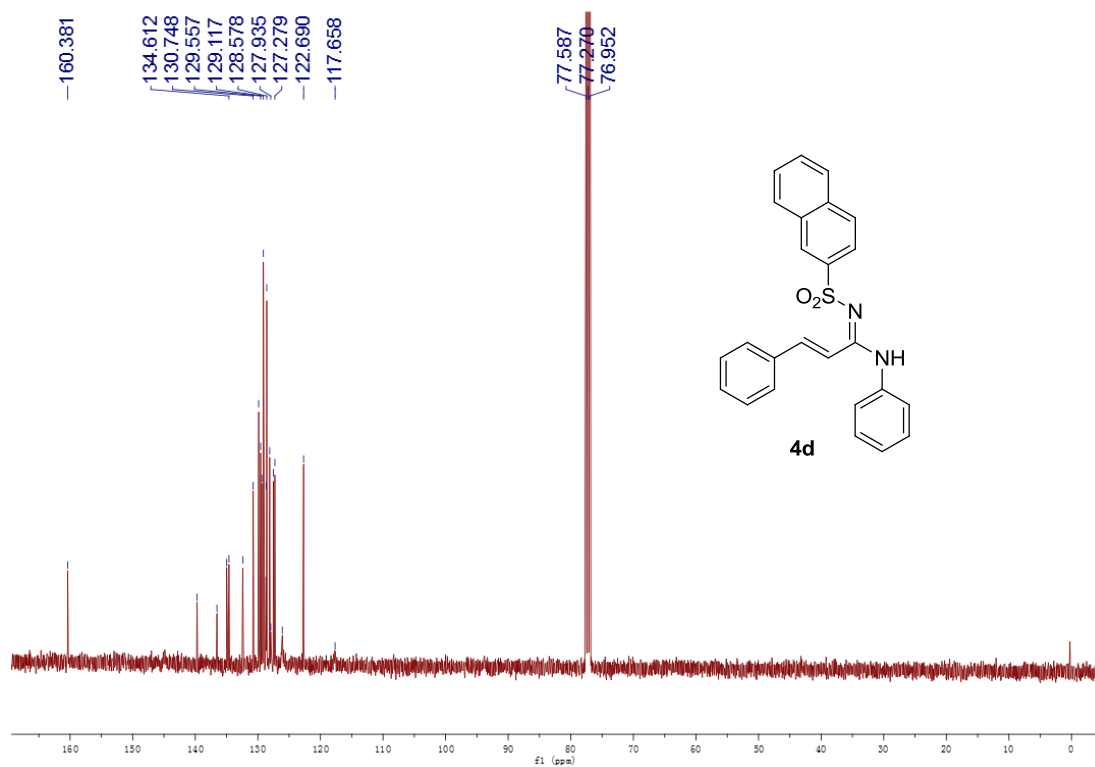

Figure S5  $^1\text{H}$  NMR and  $^{13}\text{C}$  NMR of **4e**

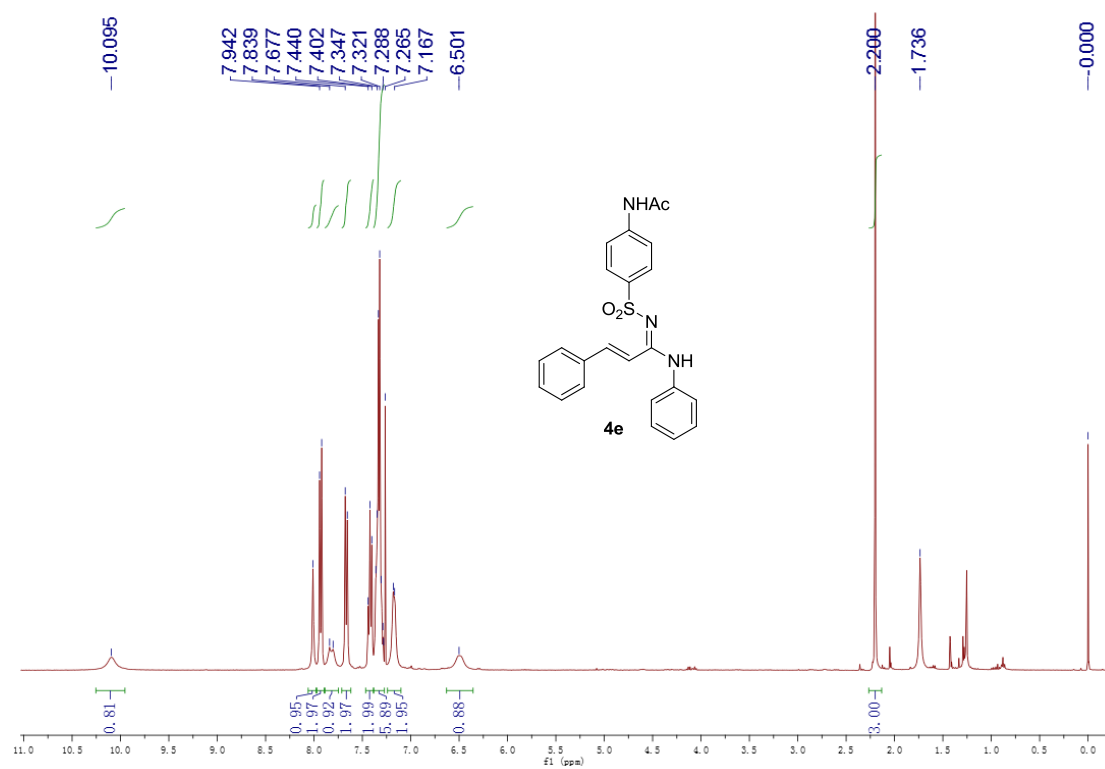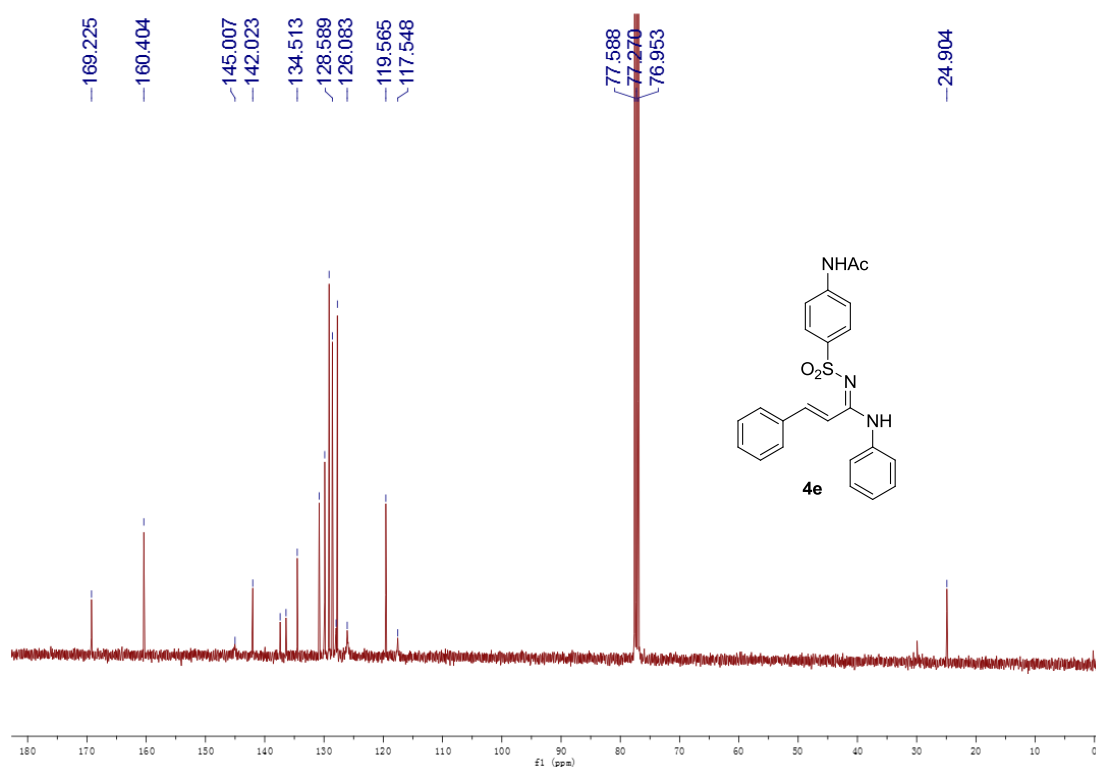

Figure S6  $^1\text{H}$  NMR and  $^{13}\text{C}$  NMR of **4f**

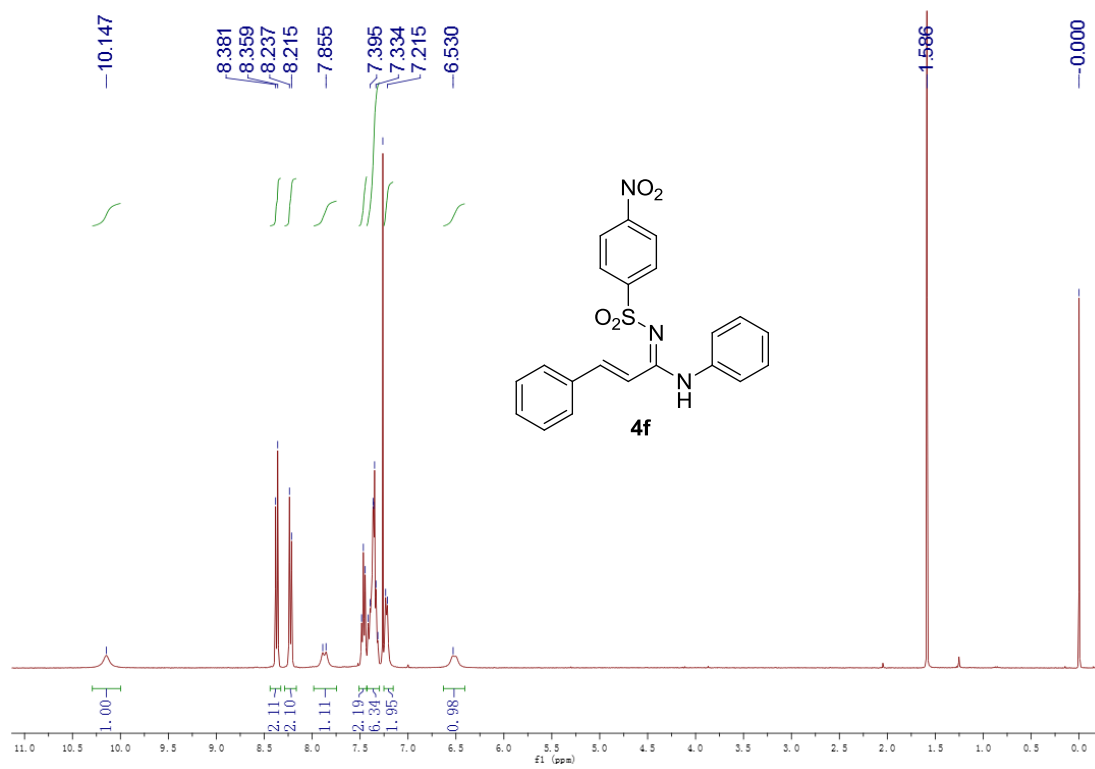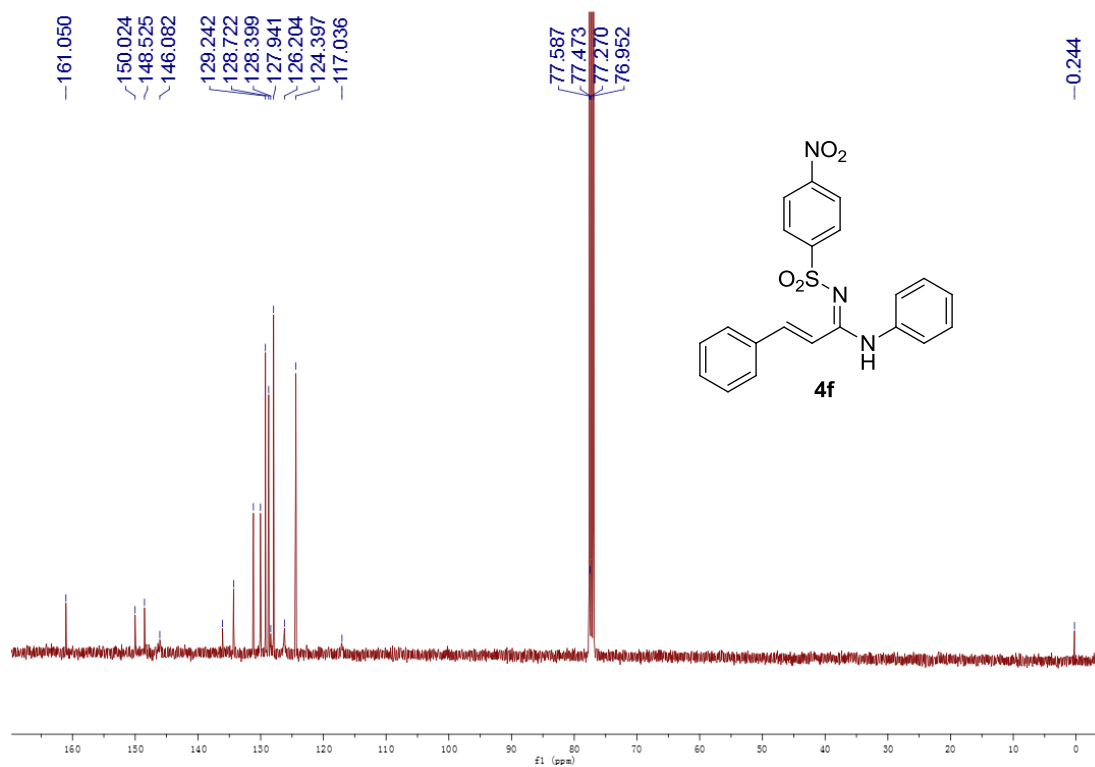

**Figure S7**  $^1\text{H}$  NMR and  $^{13}\text{C}$  NMR of **4g**

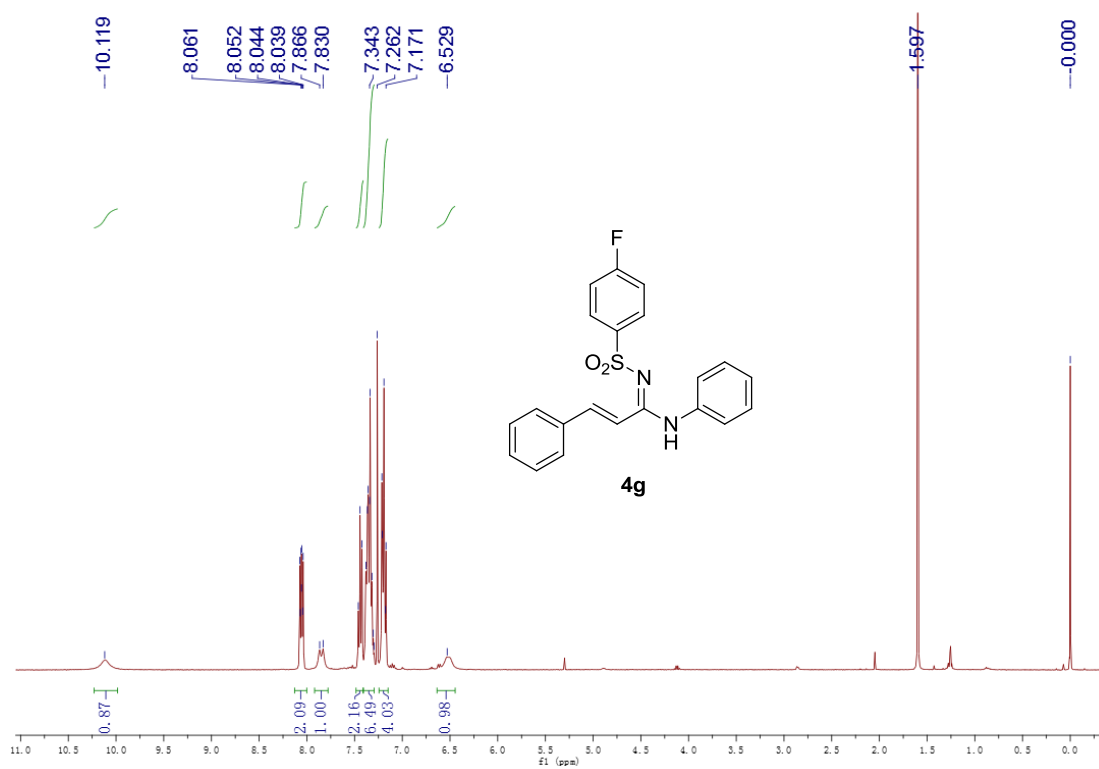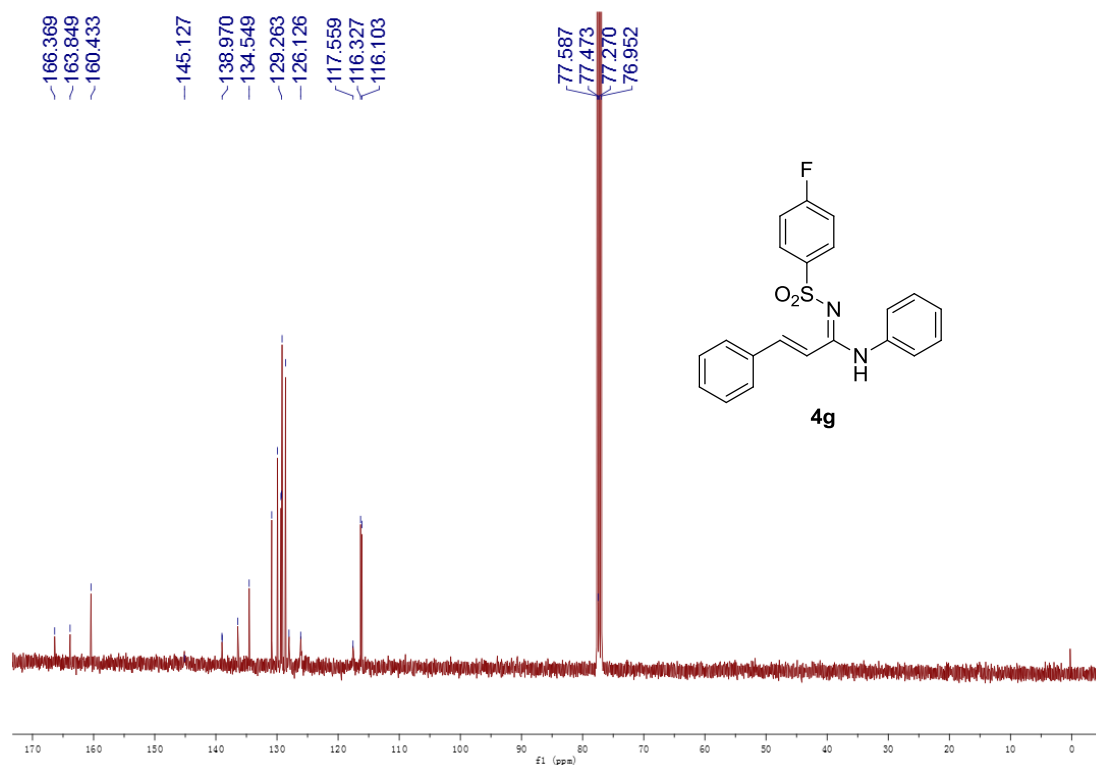



**Figure S8**  $^1\text{H}$  NMR and  $^{13}\text{C}$  NMR of **4h**

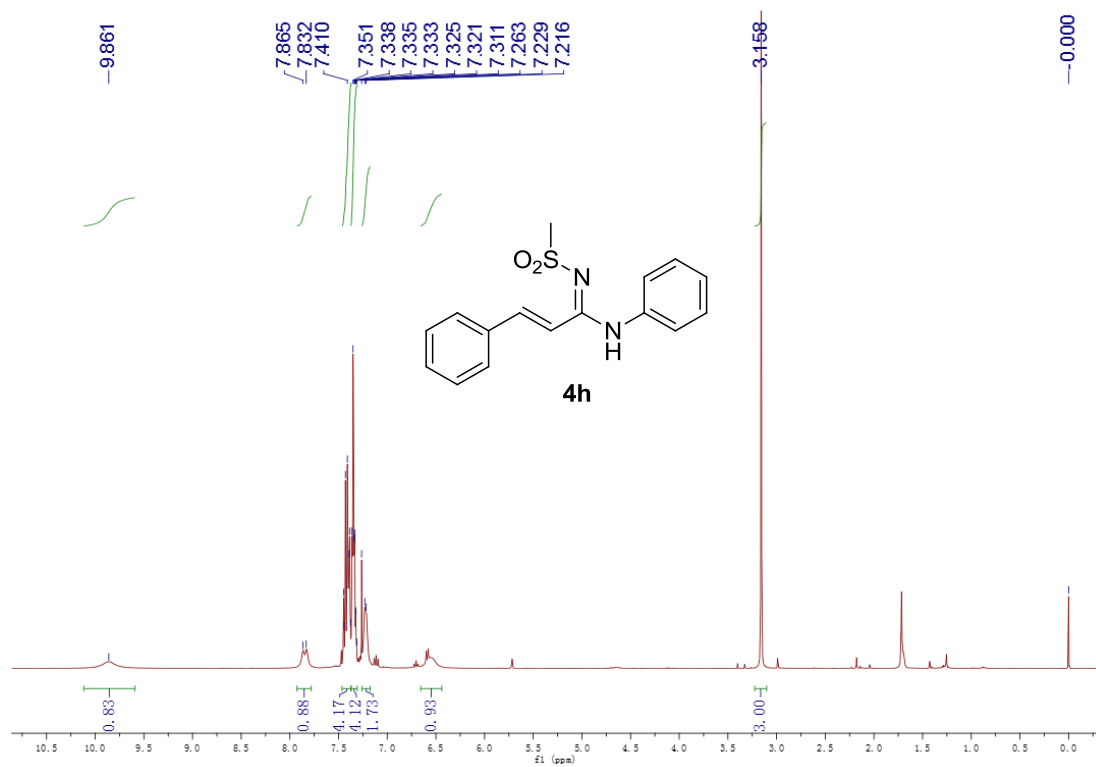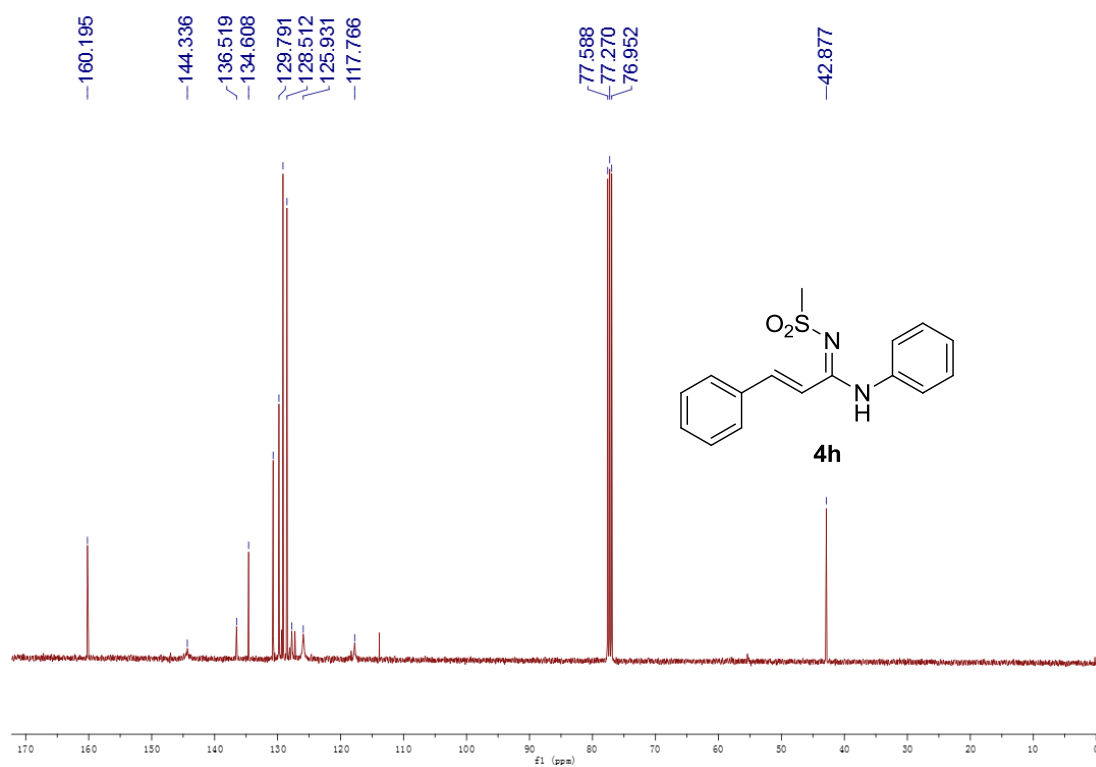

**Figure S9**  $^1\text{H}$  NMR and  $^{13}\text{C}$  NMR of **4i**

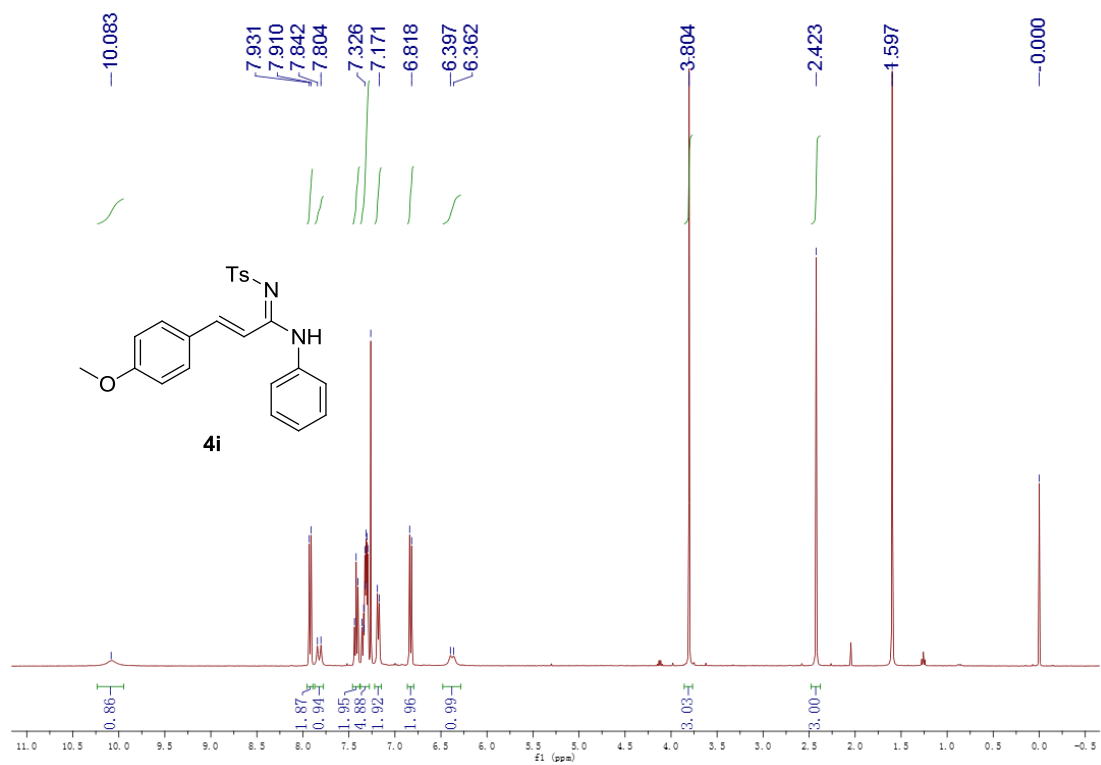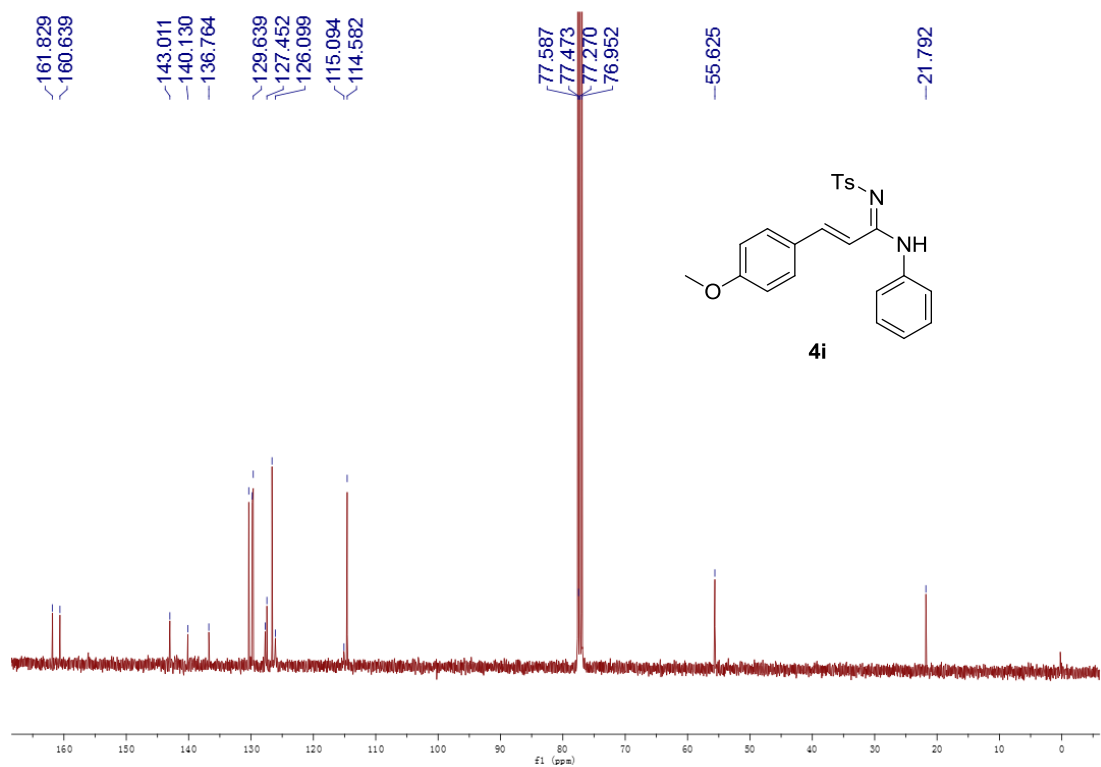

Figure S10  $^1\text{H}$  NMR and  $^{13}\text{C}$  NMR of **4j**

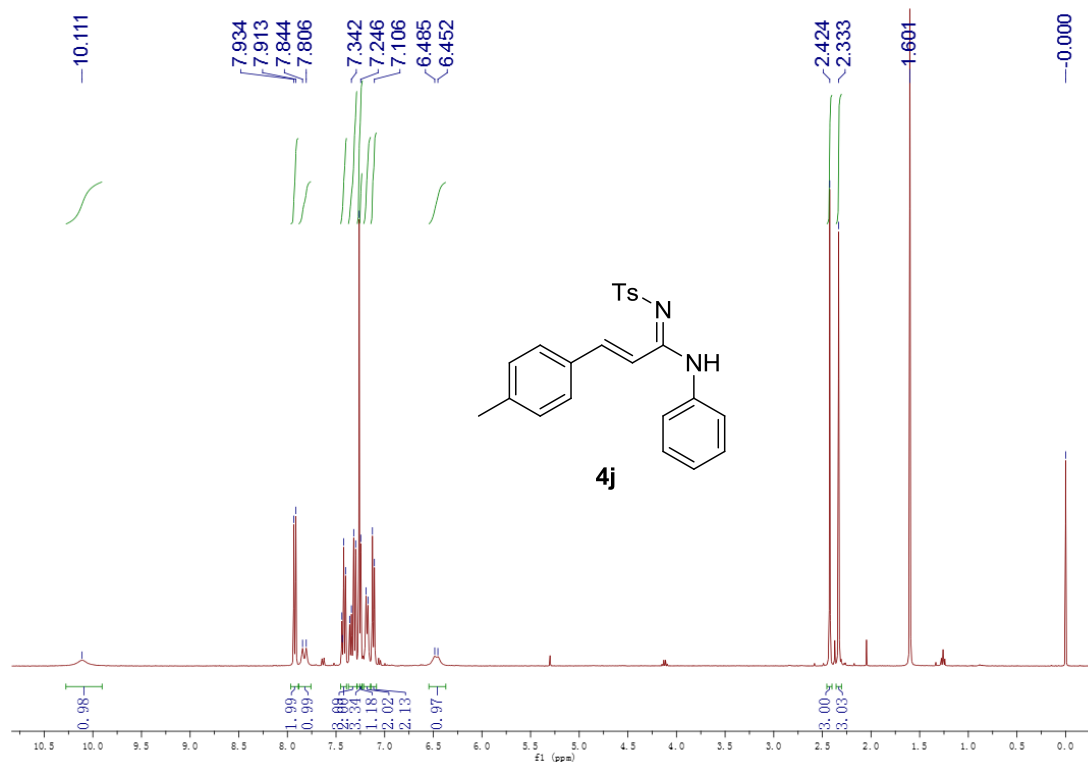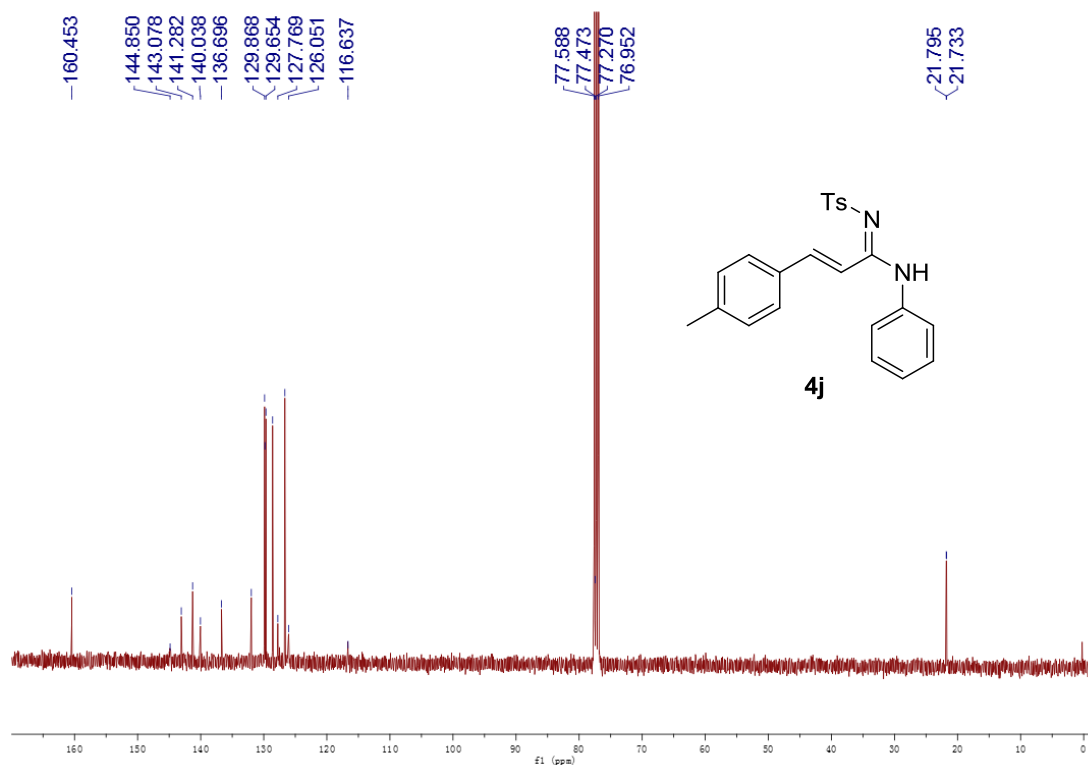

Figure S11  $^1\text{H}$  NMR and  $^{13}\text{C}$  NMR of **4k**

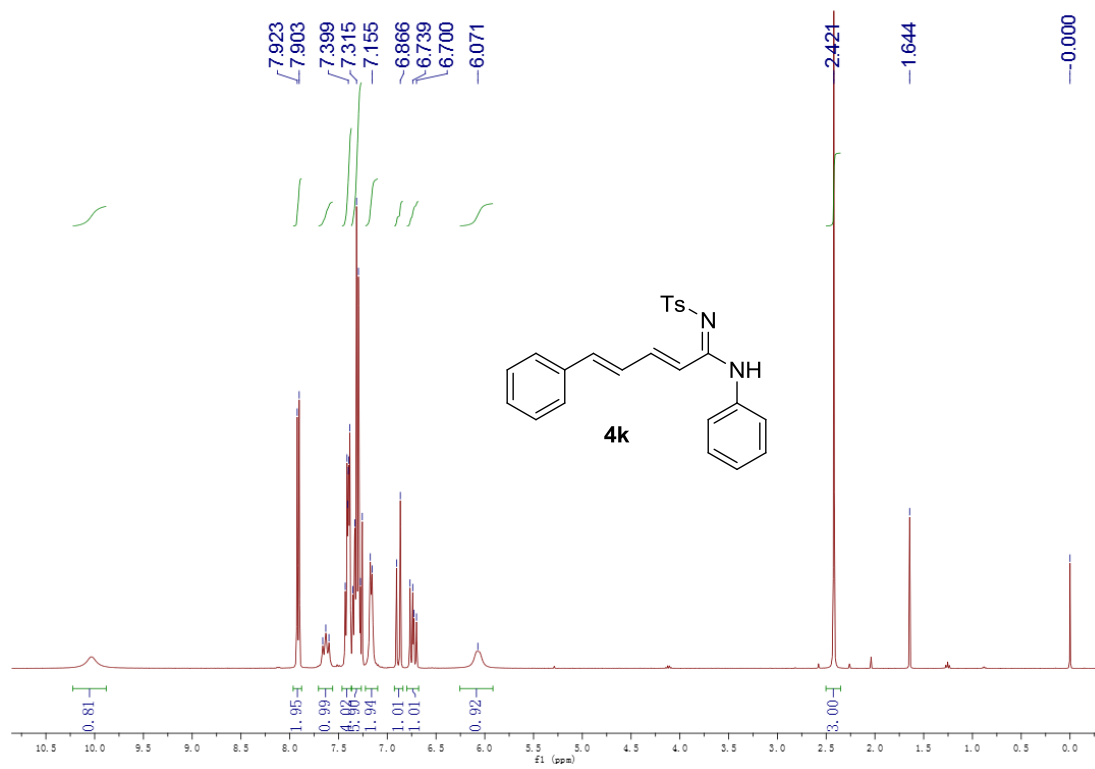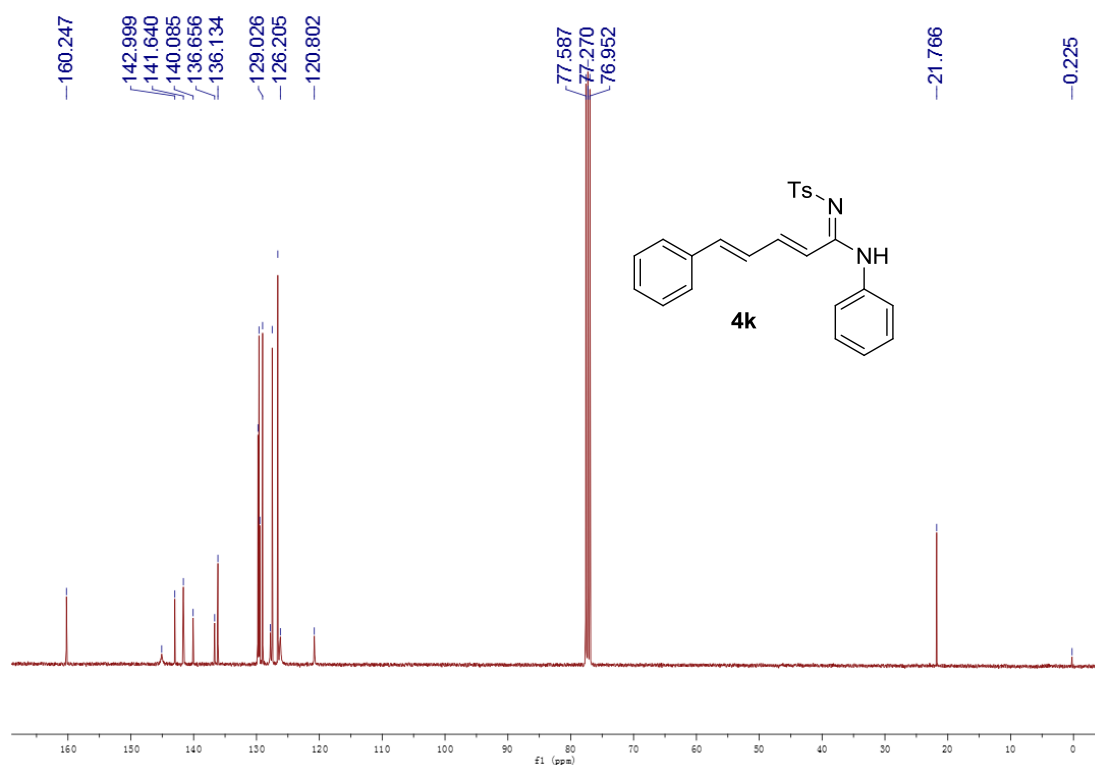

**Figure S12**  $^1\text{H}$  NMR and  $^{13}\text{C}$  NMR of **4I**

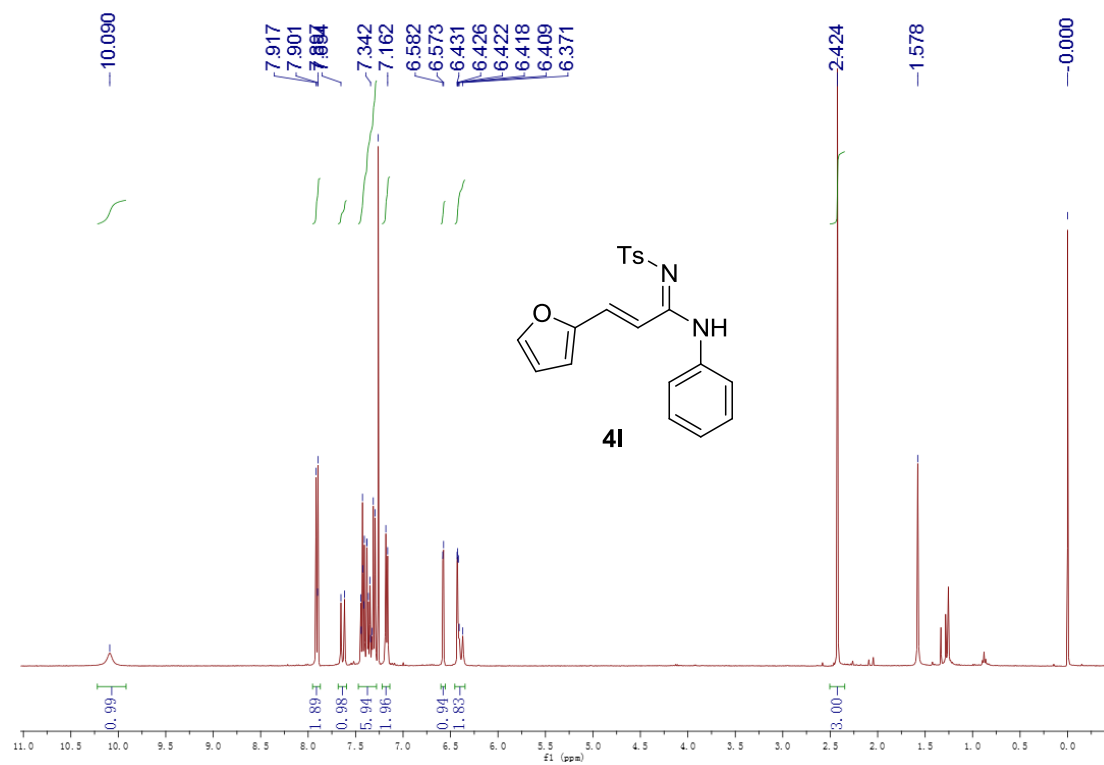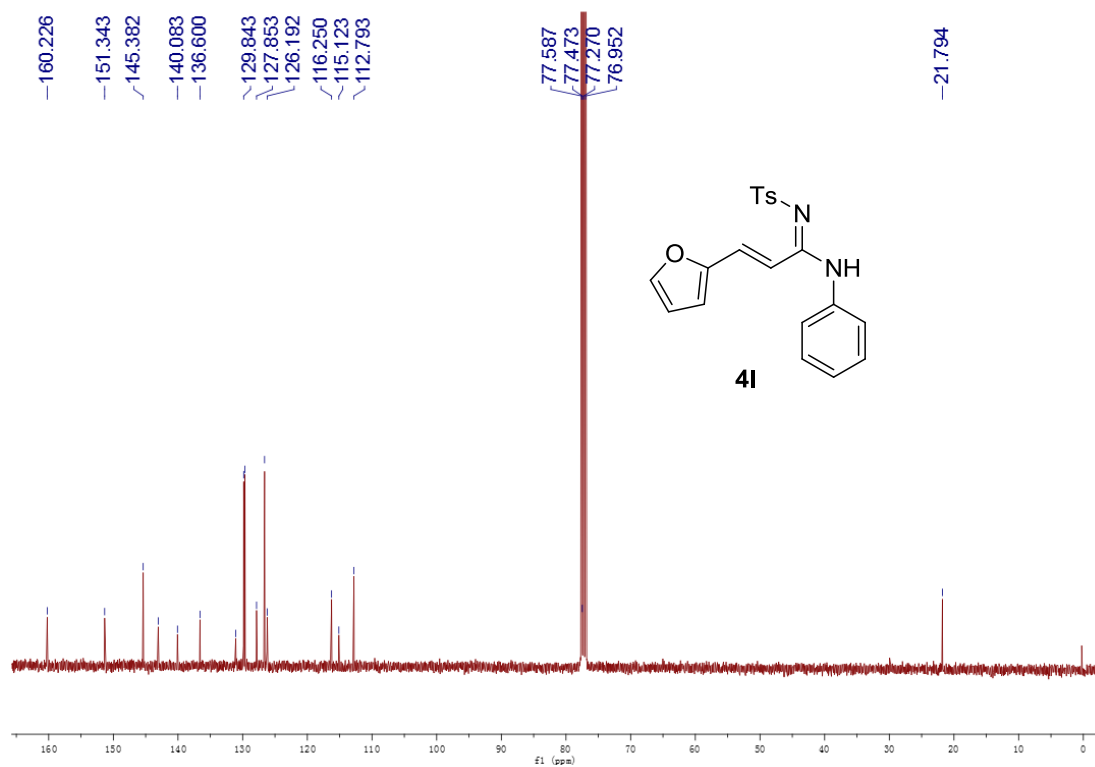

Figure S13  $^1\text{H}$  NMR and  $^{13}\text{C}$  NMR of **4m**

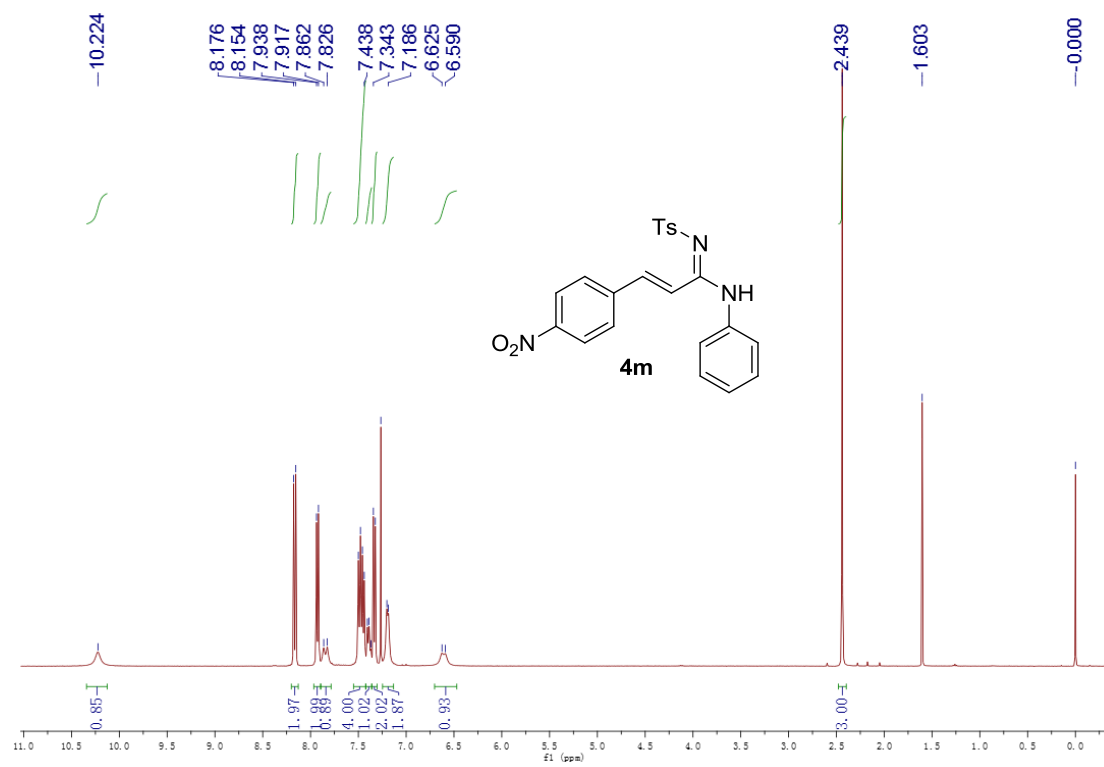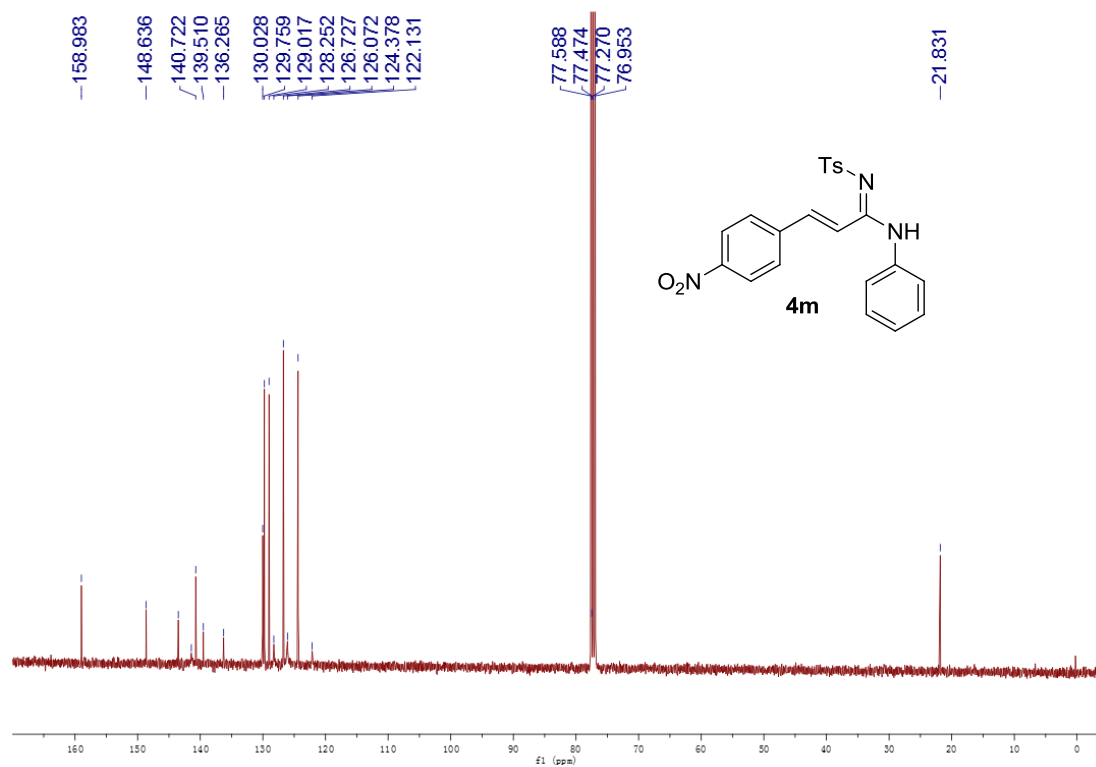

**Figure S14**  $^1\text{H}$  NMR and  $^{13}\text{C}$  NMR of **4n**

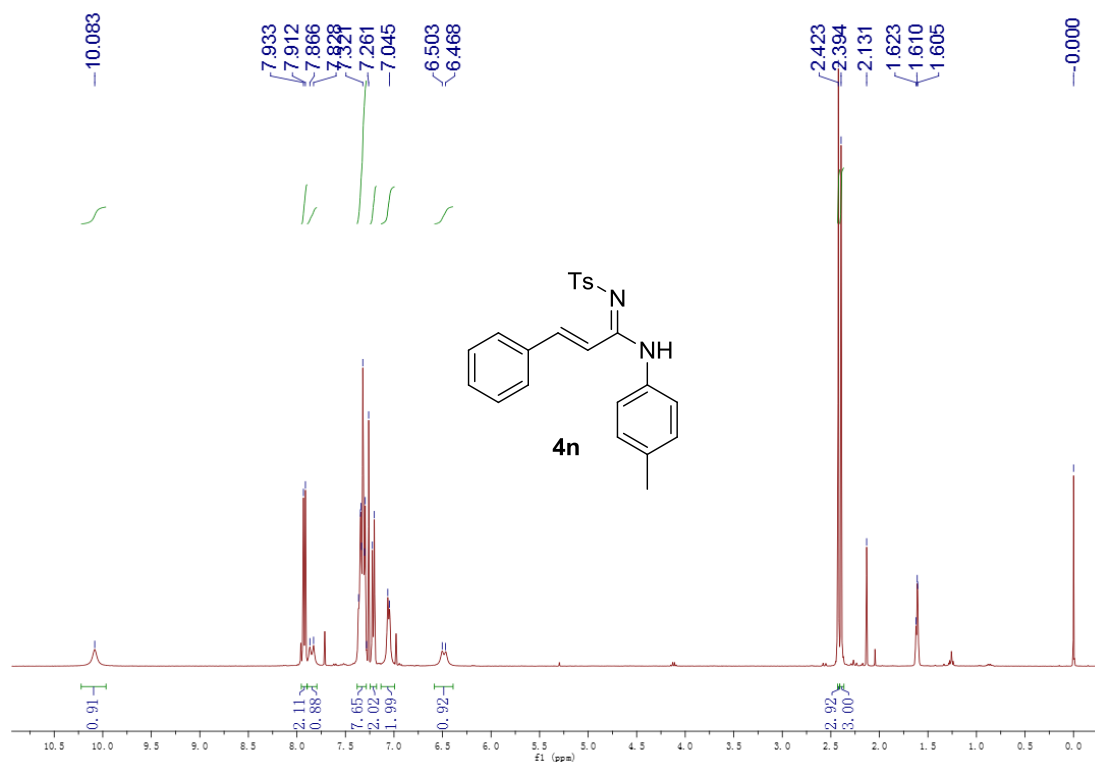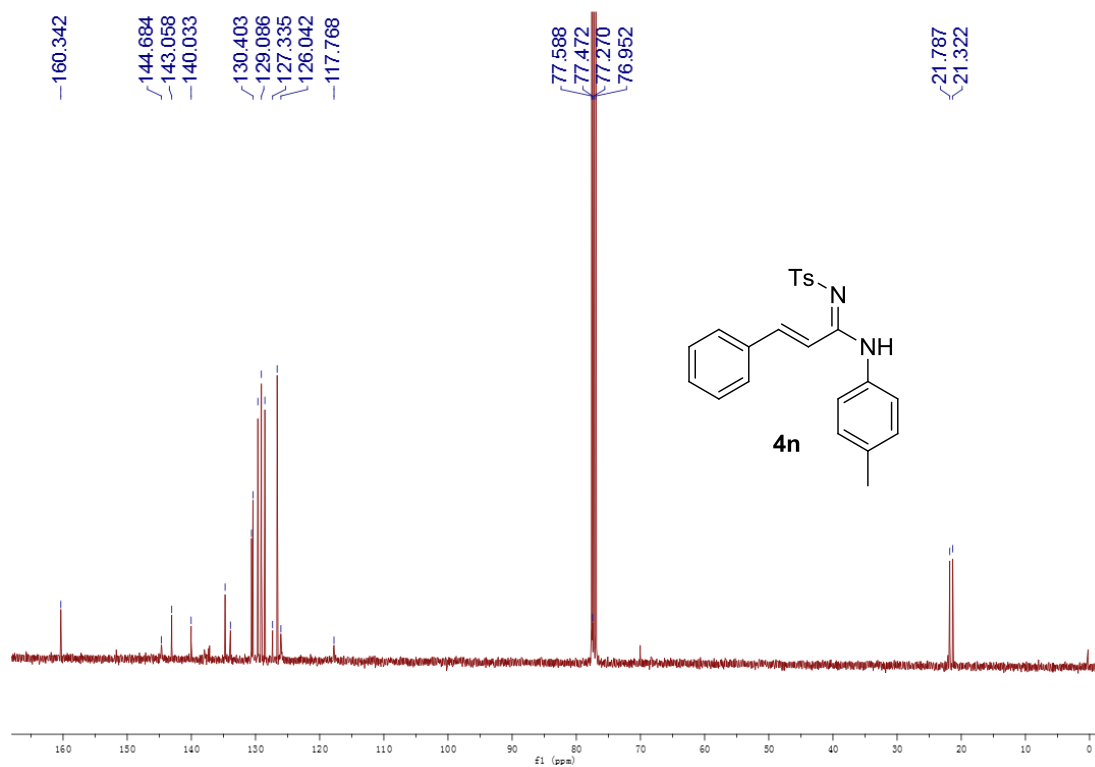

Figure S15  $^1\text{H}$  NMR and  $^{13}\text{C}$  NMR of **4o**

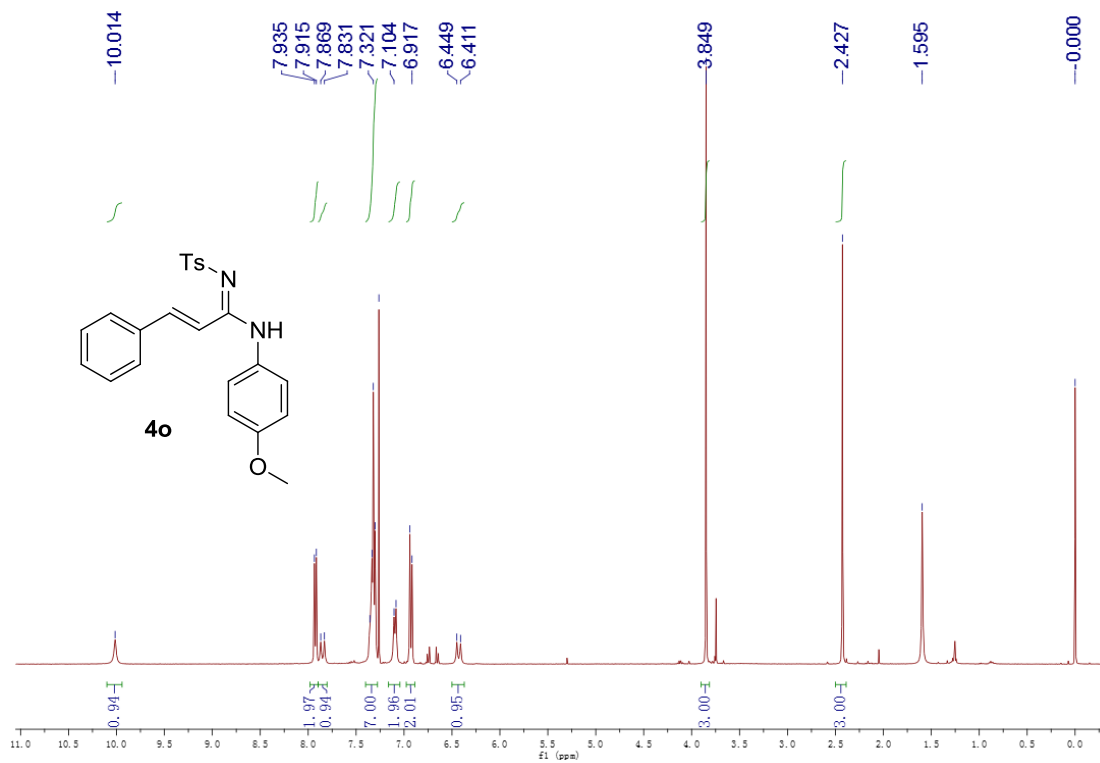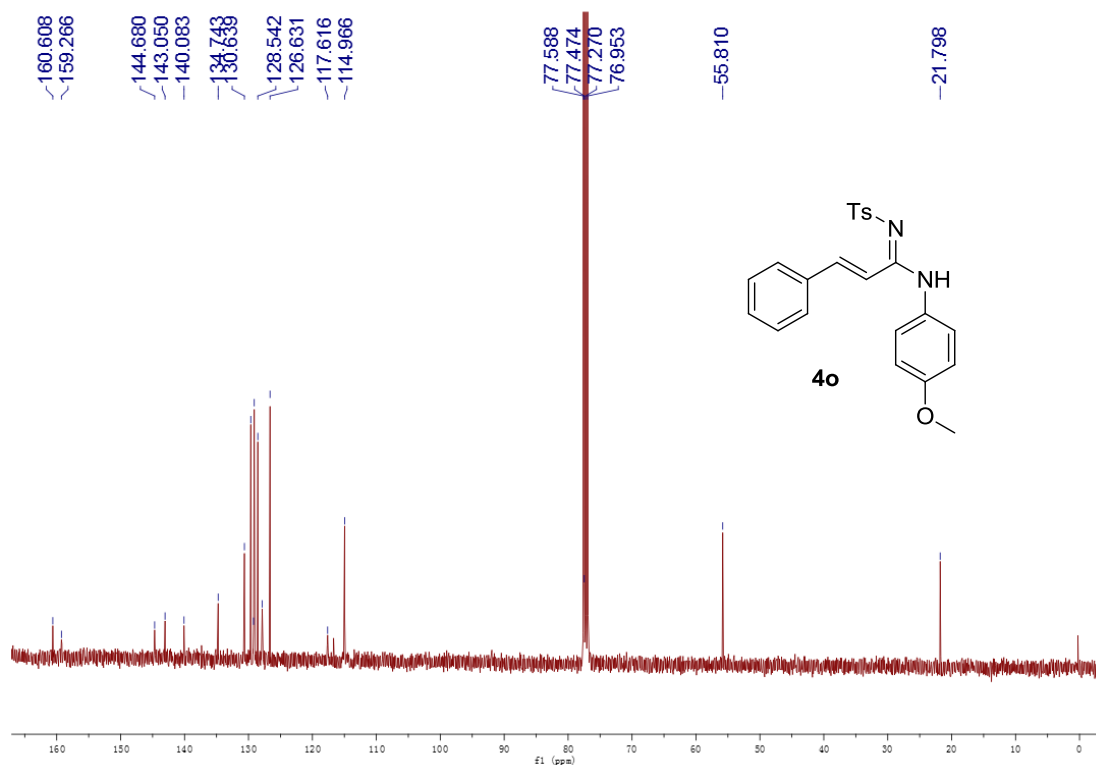



Figure S16  $^1\text{H}$  NMR and  $^{13}\text{C}$  NMR of 4p

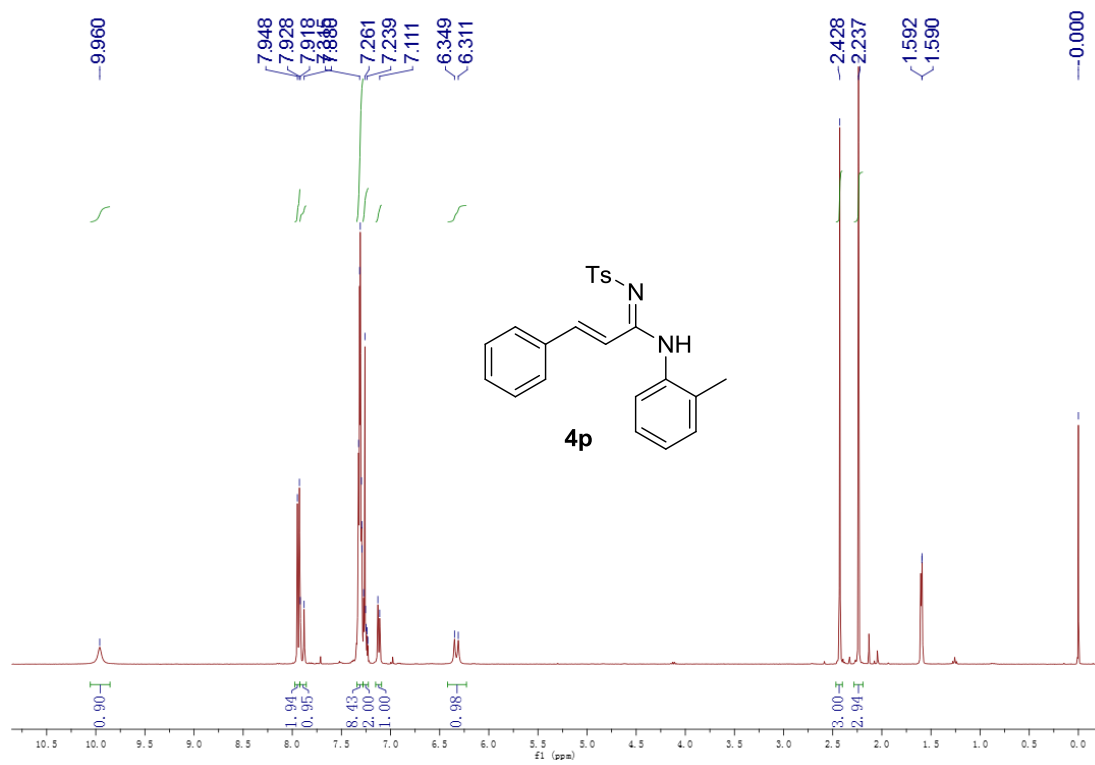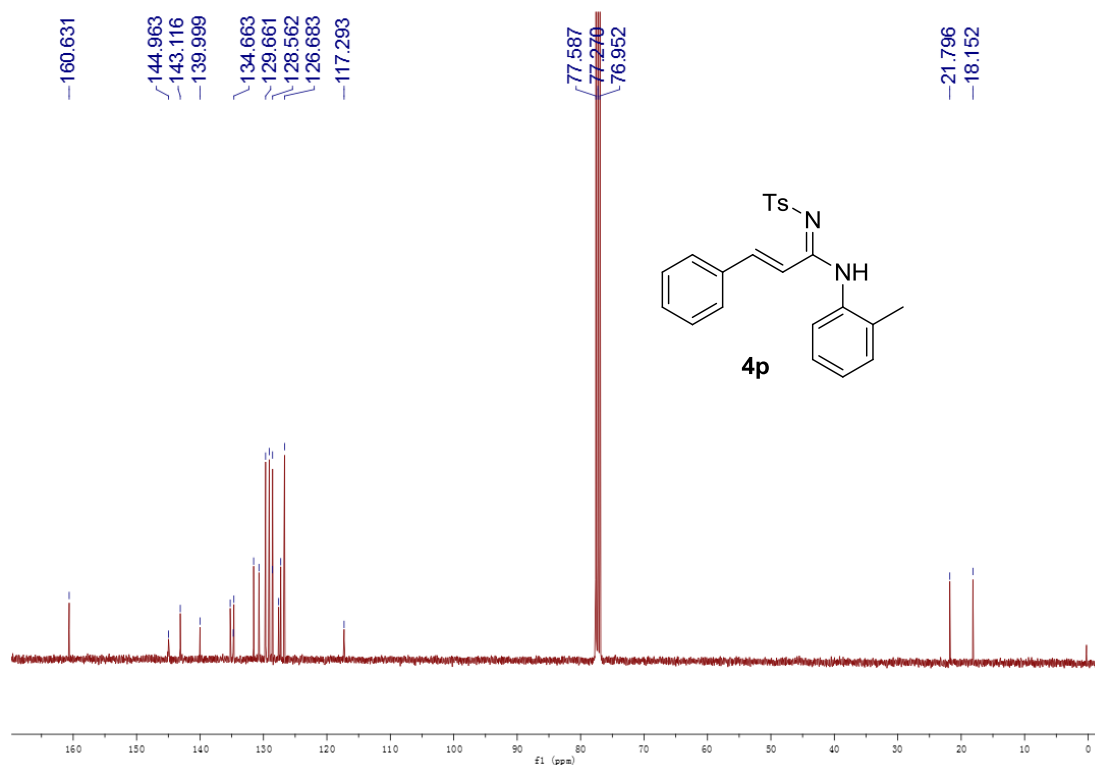

Figure S17  $^1\text{H}$  NMR and  $^{13}\text{C}$  NMR of **4q**

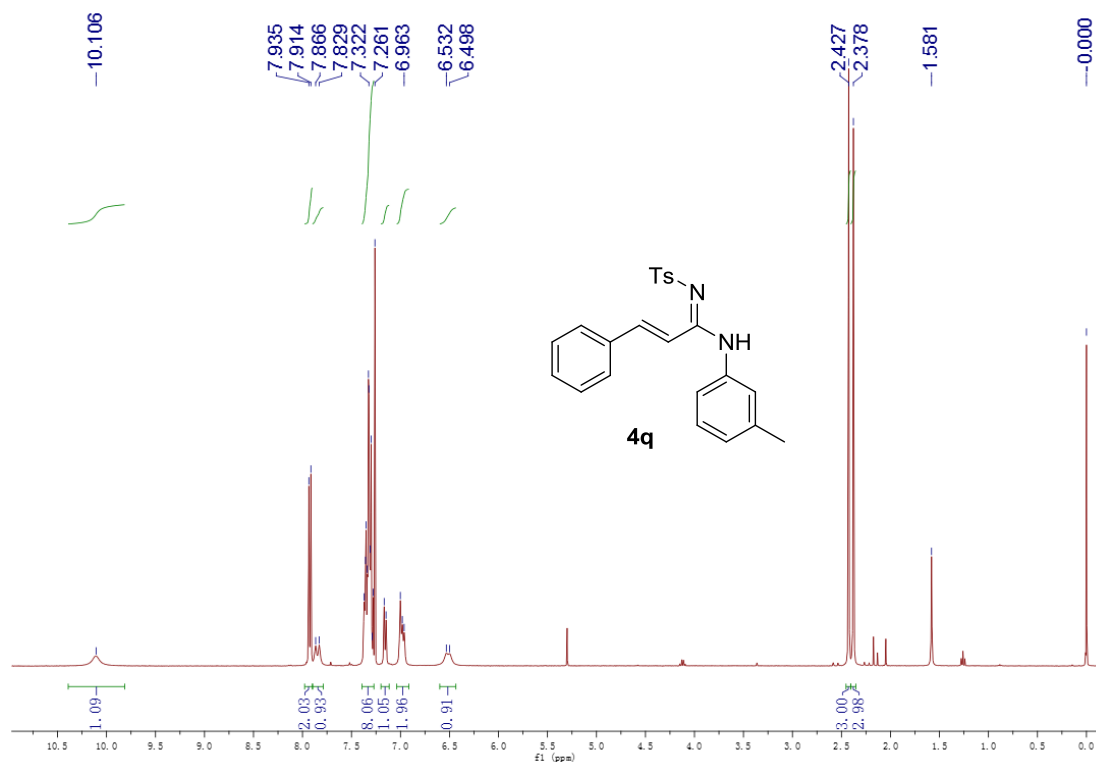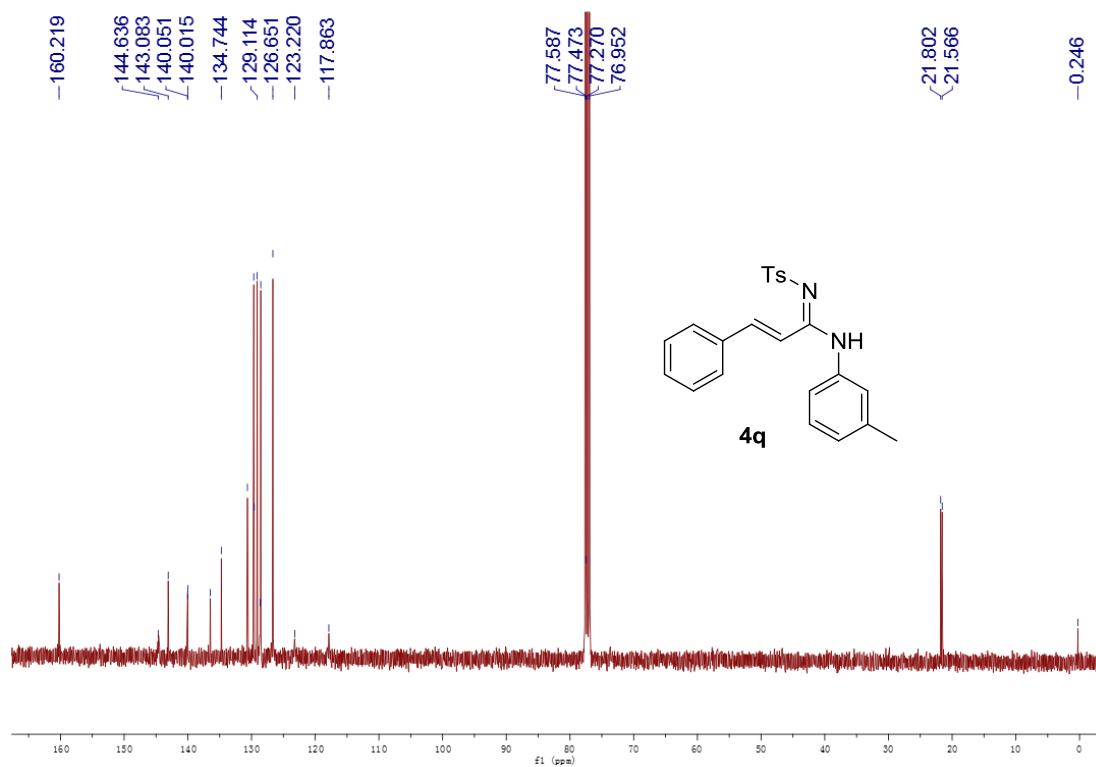

**Figure S18**  $^1\text{H}$  NMR and  $^{13}\text{C}$  NMR of **4r**

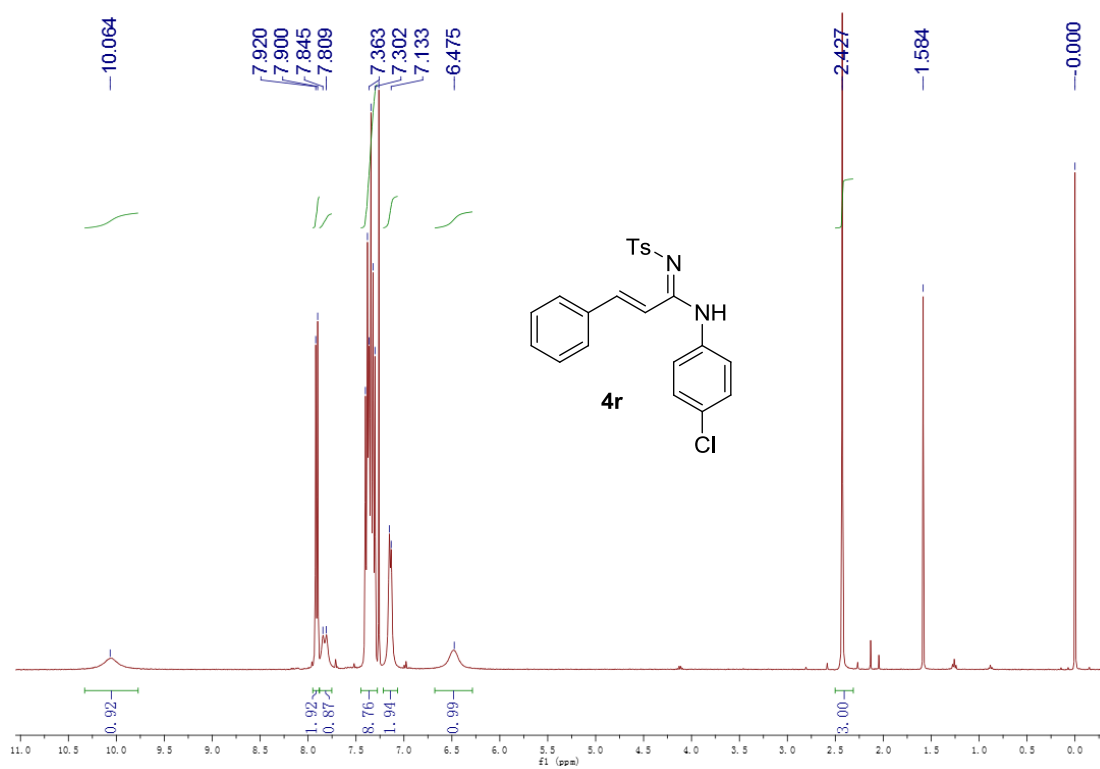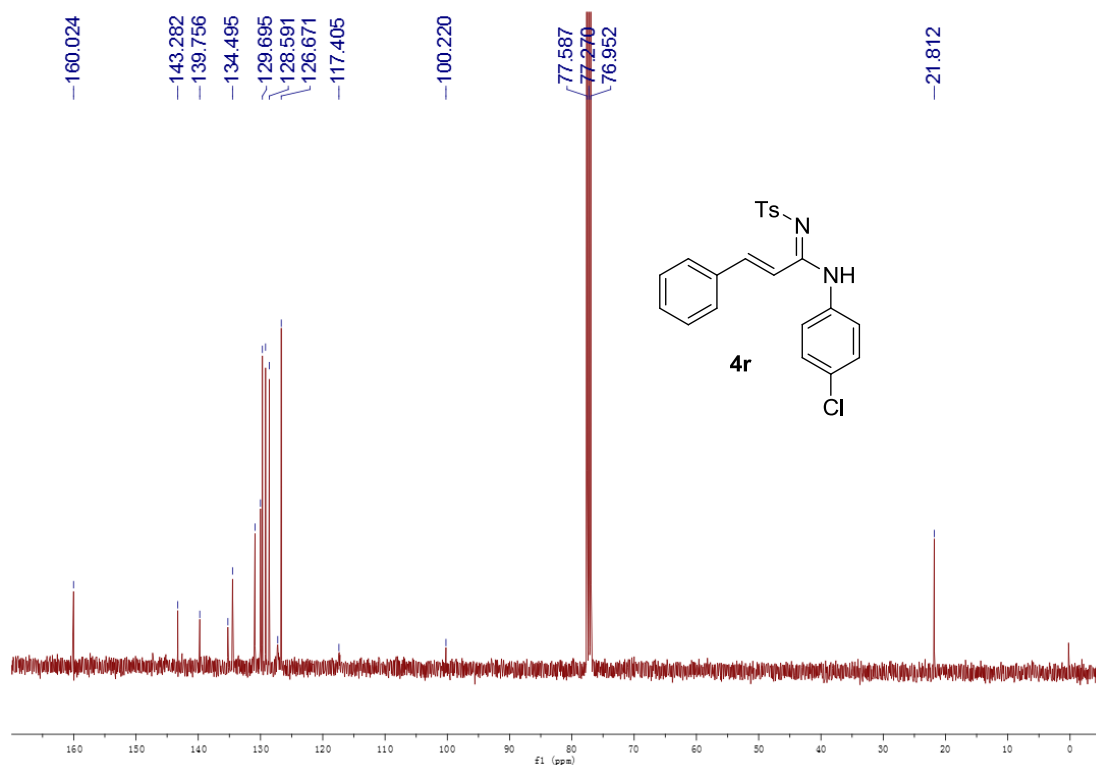

**Figure S19**  $^1\text{H}$  NMR and  $^{13}\text{C}$  NMR of **5a**

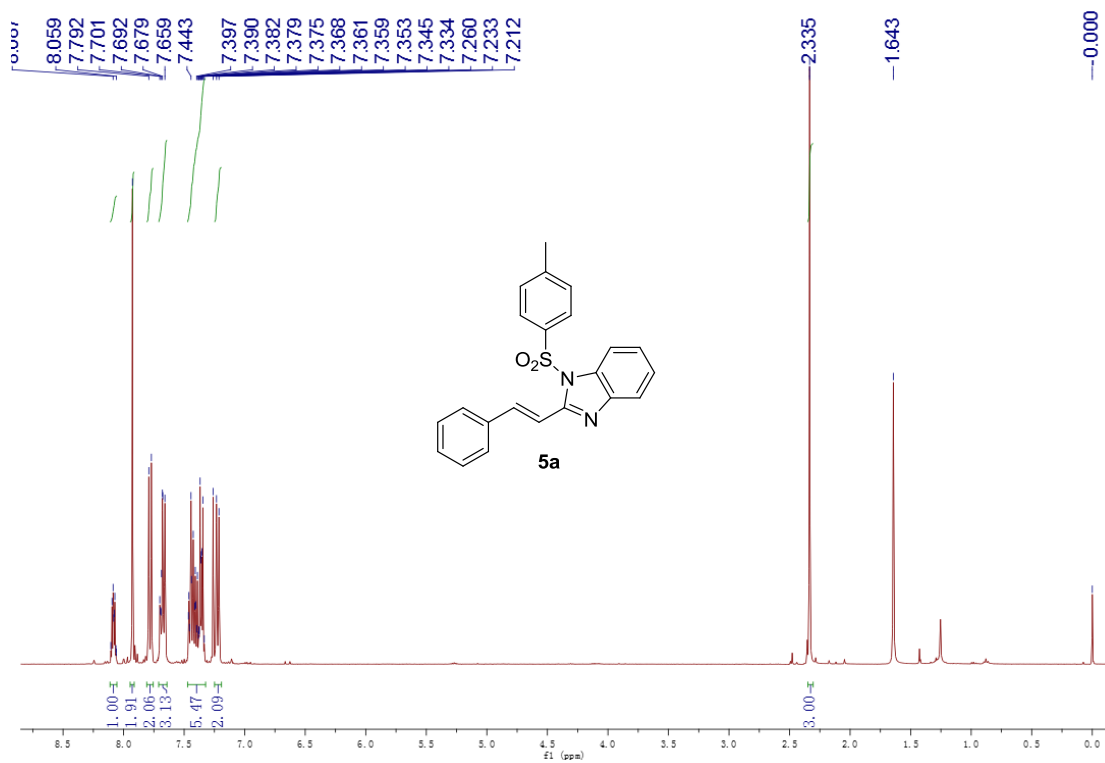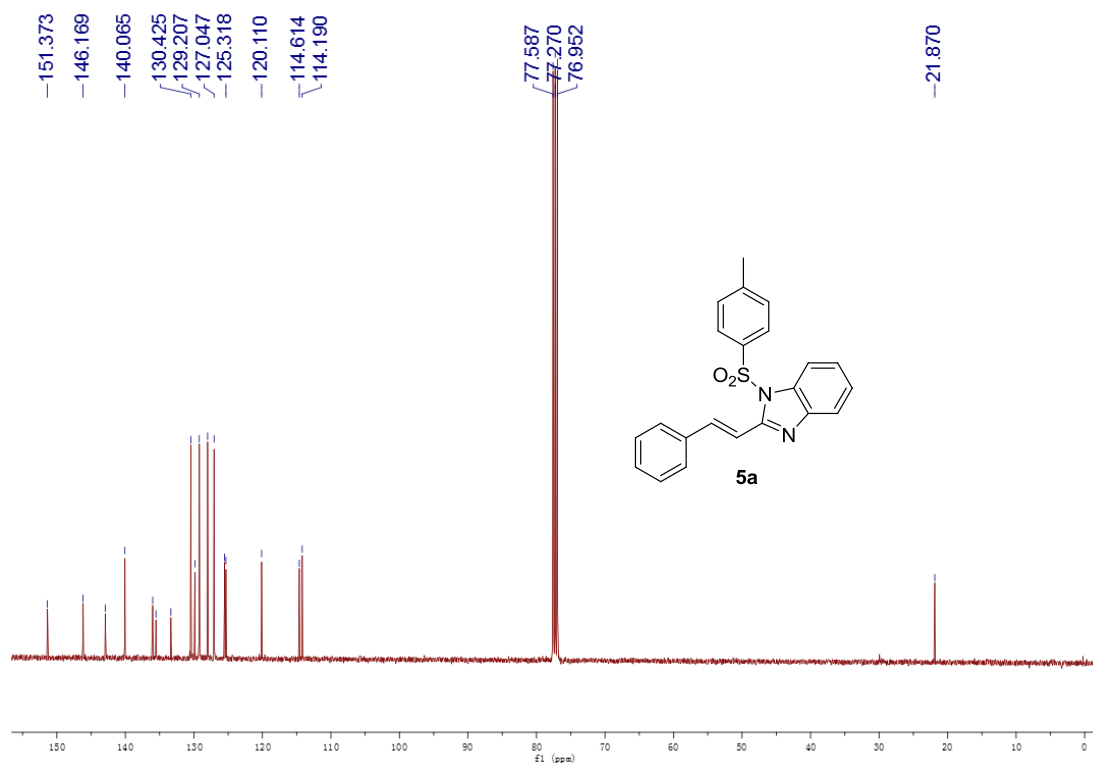

**Figure S20**  $^1\text{H}$  NMR and  $^{13}\text{C}$  NMR of **5b**

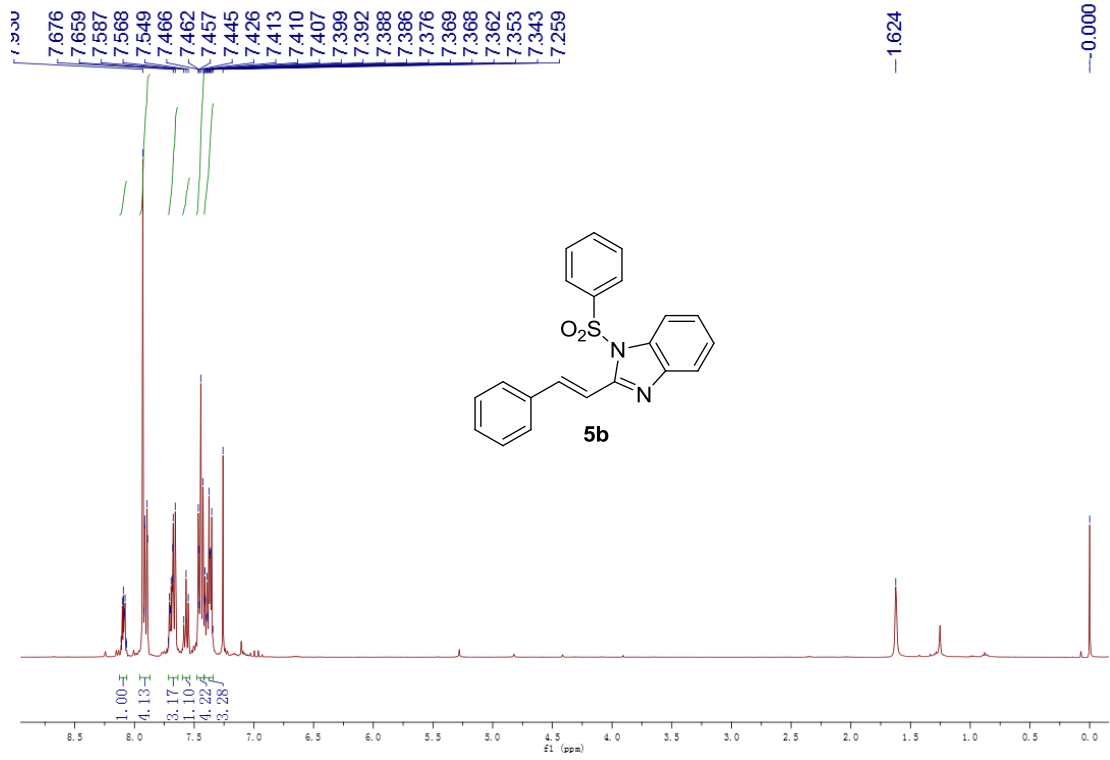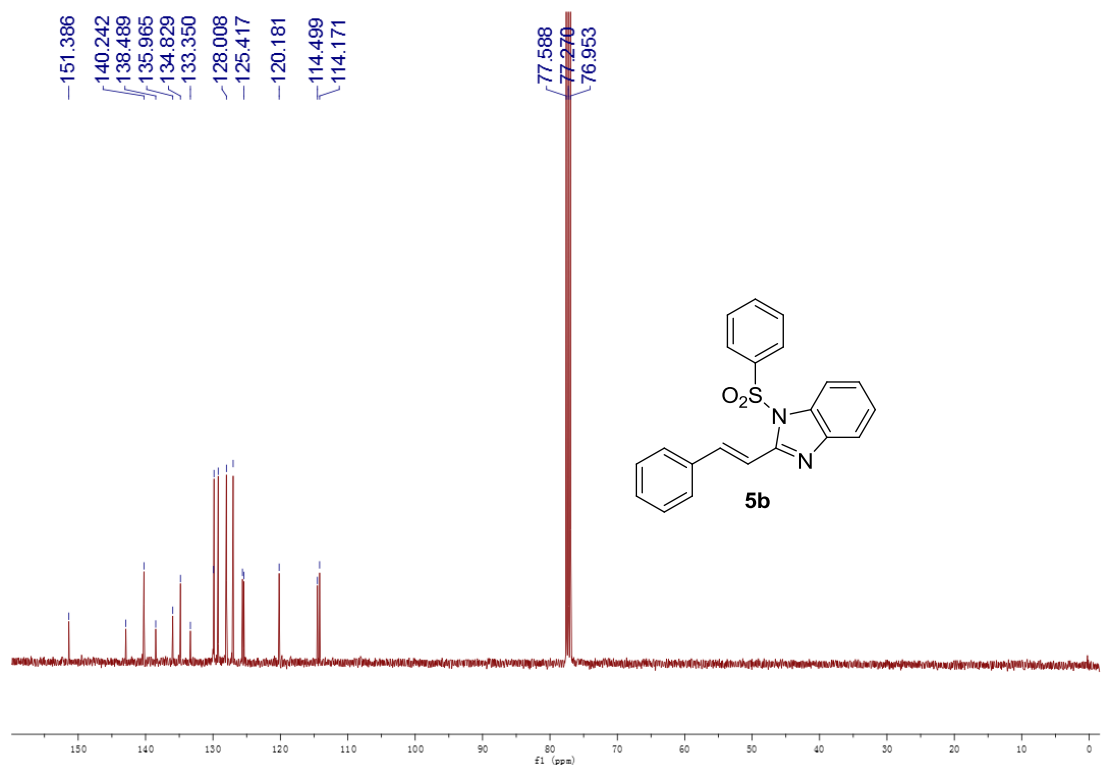

**Figure S21**  $^1\text{H}$  NMR and  $^{13}\text{C}$  NMR of **5c**

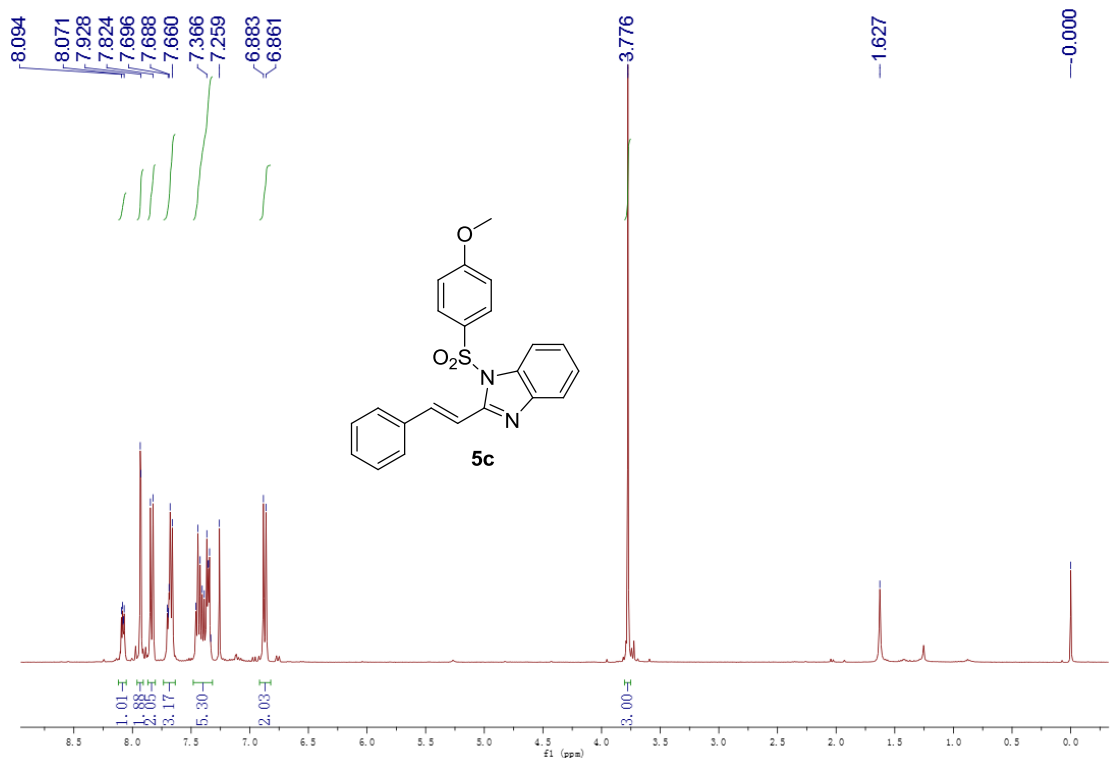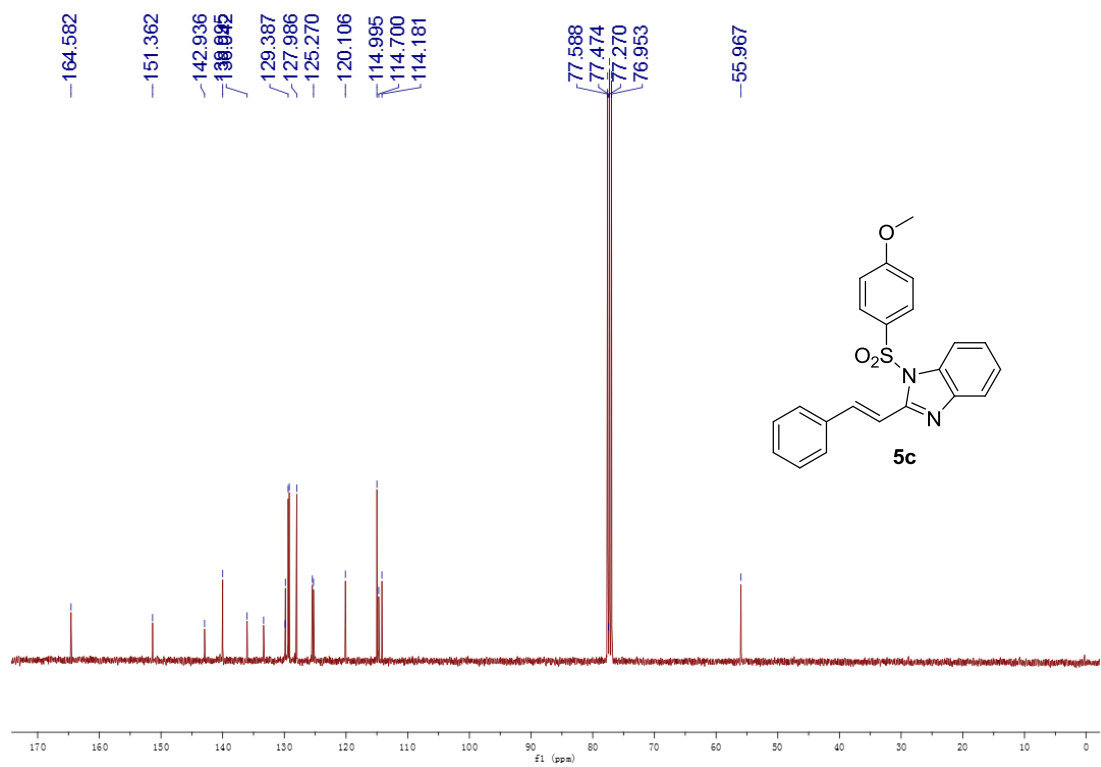

Figure S22  $^1\text{H}$  NMR and  $^{13}\text{C}$  NMR of **5d**

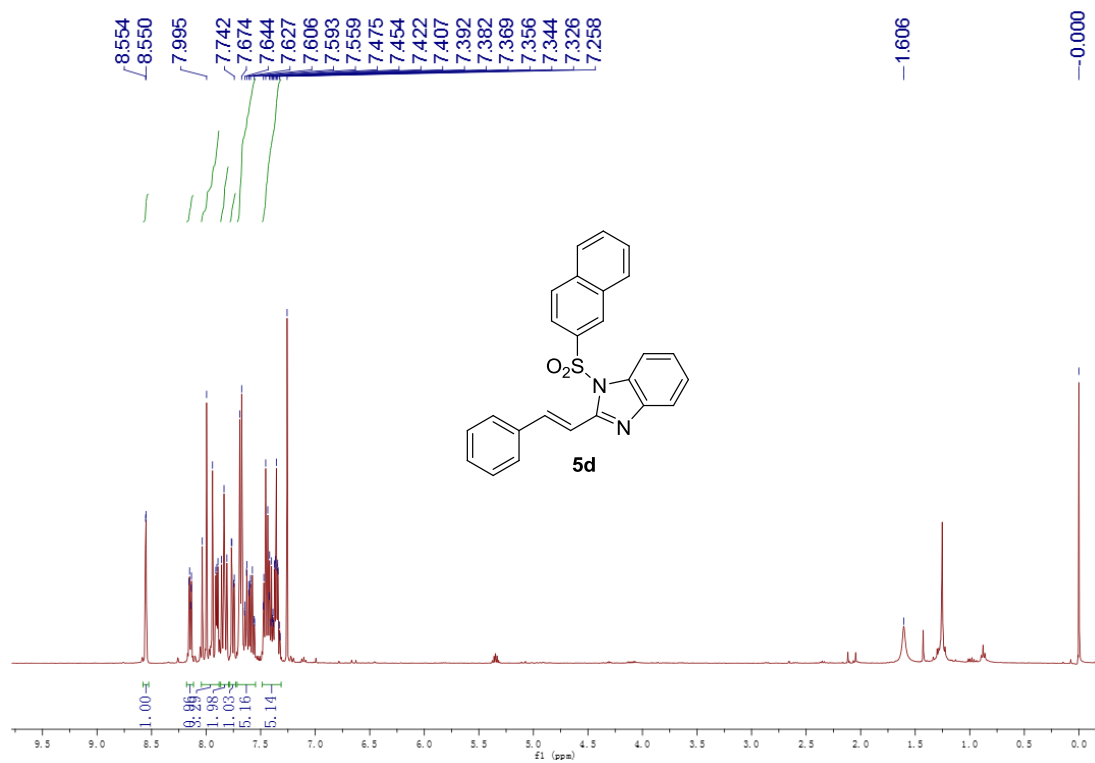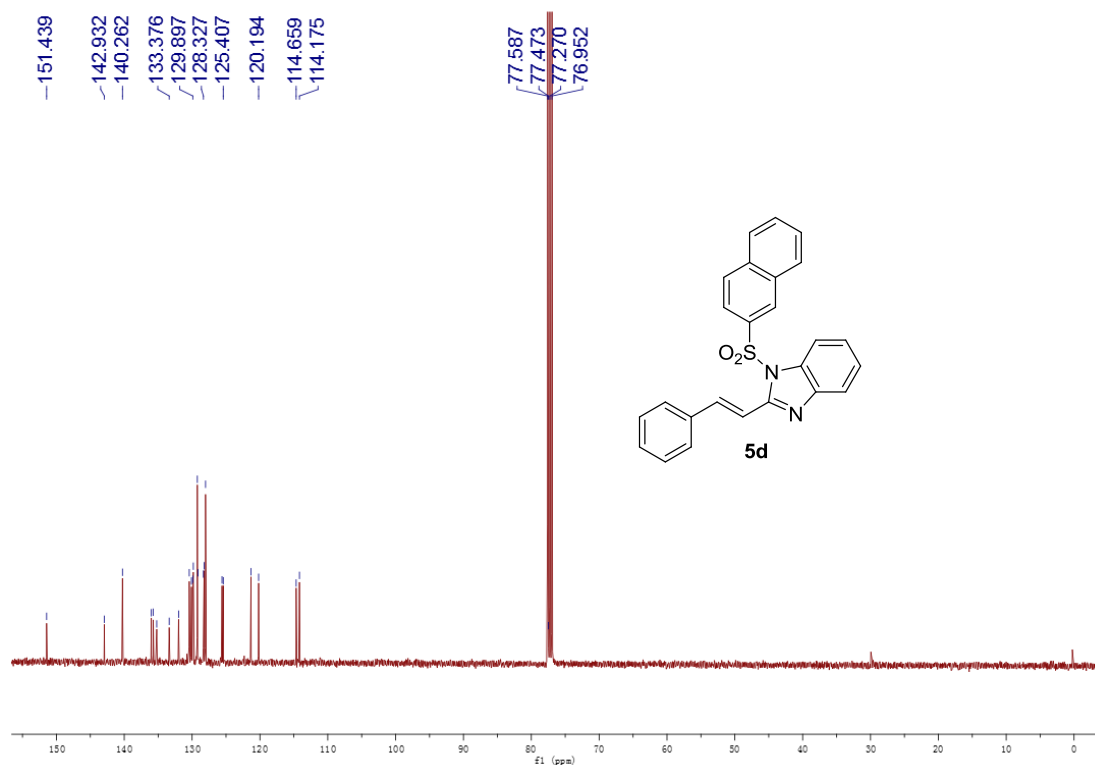

Figure S23  $^1\text{H}$  NMR and  $^{13}\text{C}$  NMR of **5e**

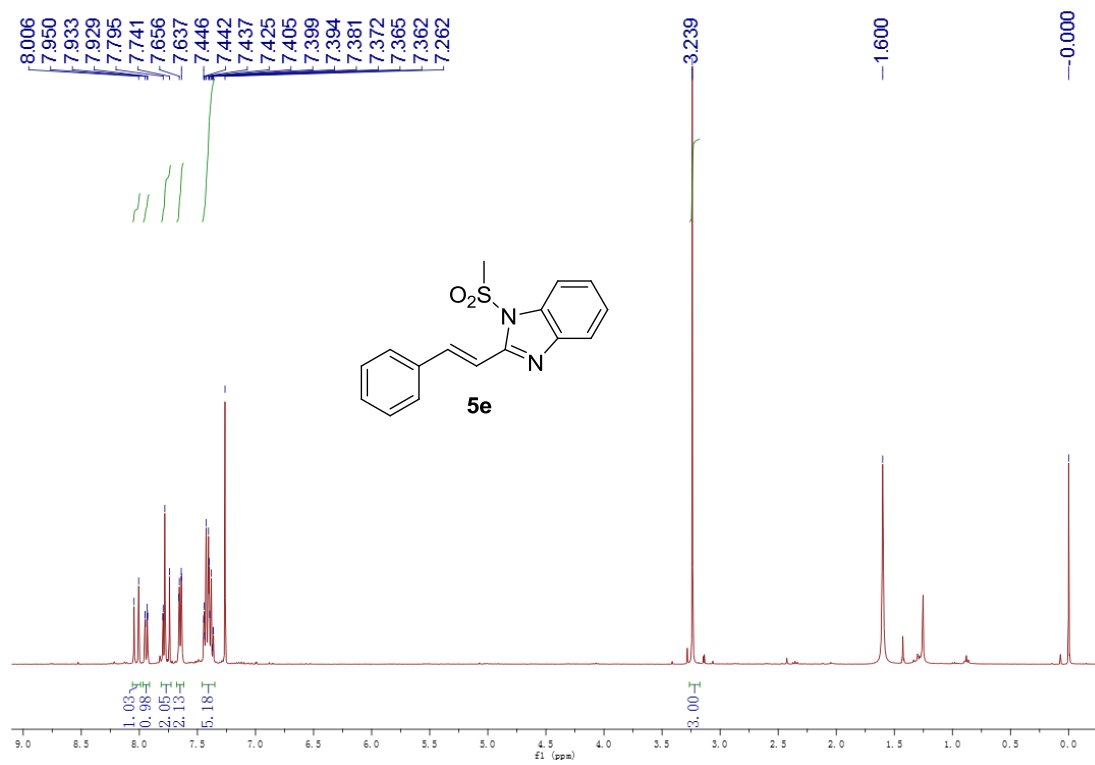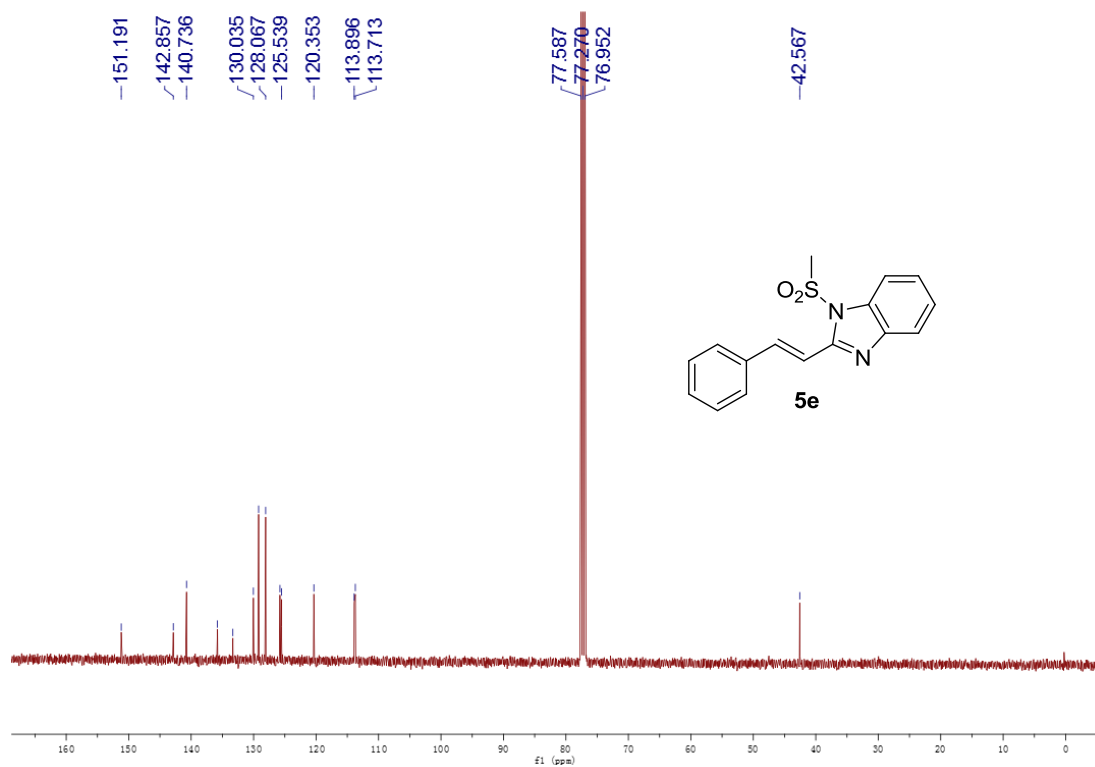



Figure S24  $^1\text{H}$  NMR and  $^{13}\text{C}$  NMR of **5f**

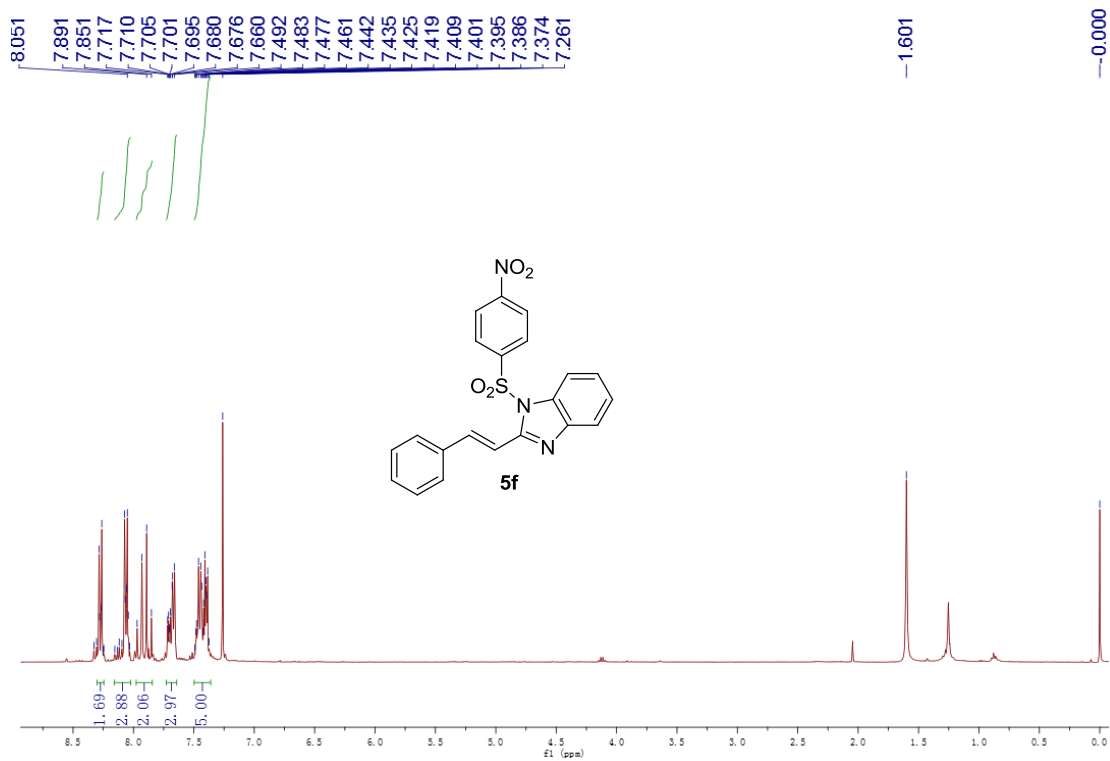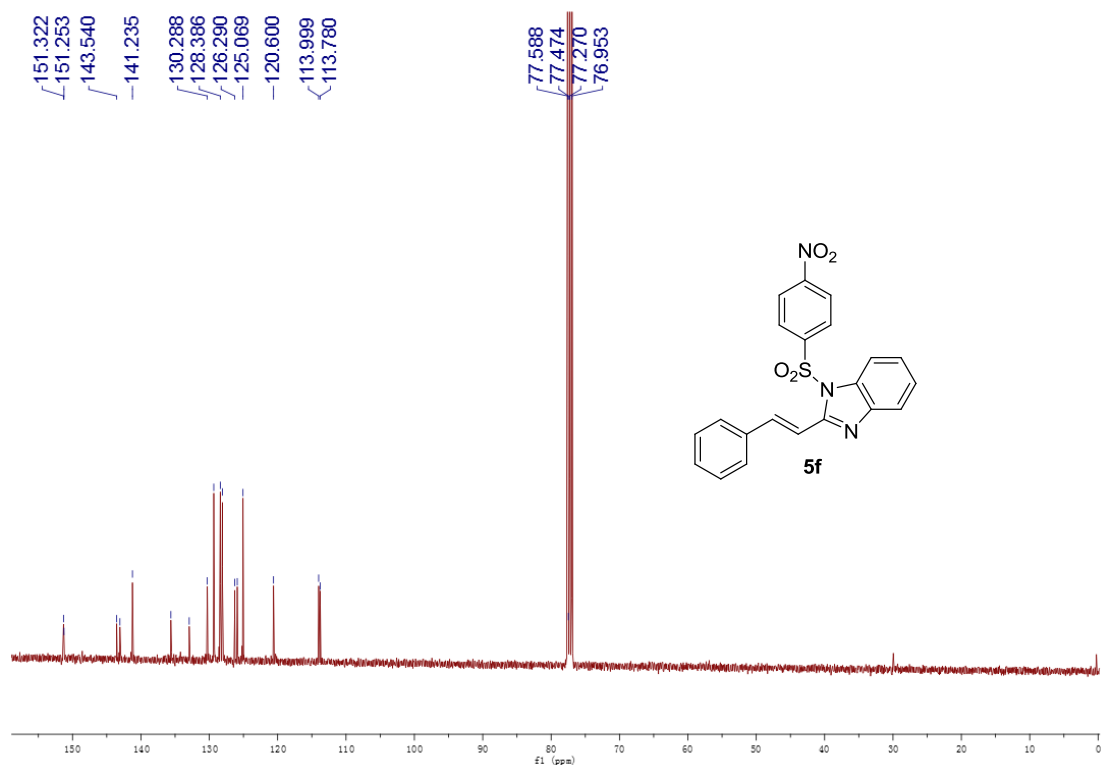

Figure S25  $^1\text{H}$  NMR and  $^{13}\text{C}$  NMR of **5g**

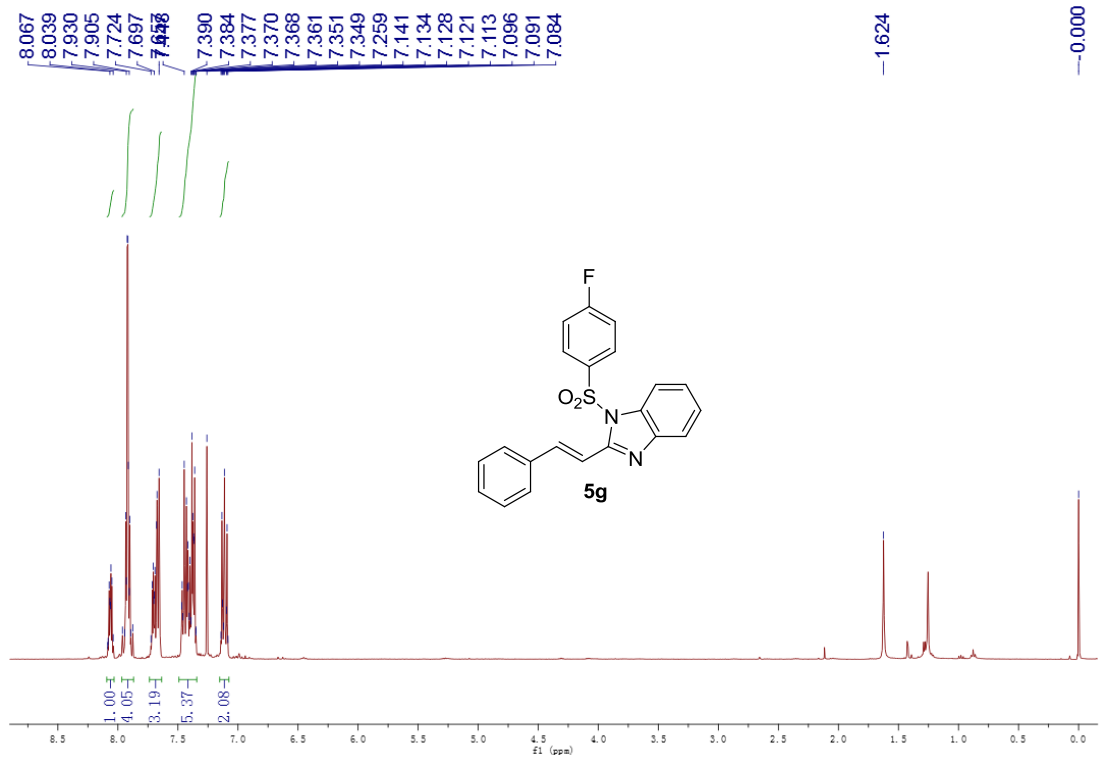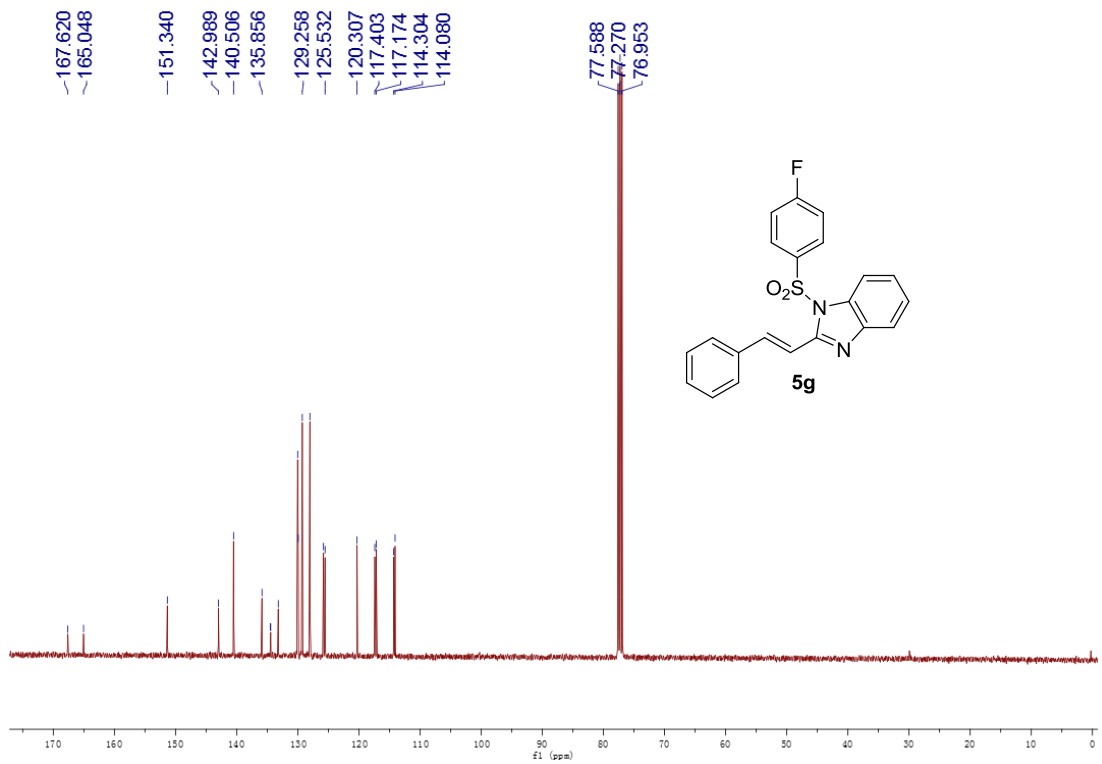

**Figure S26**  $^1\text{H}$  NMR and  $^{13}\text{C}$  NMR of **5h**

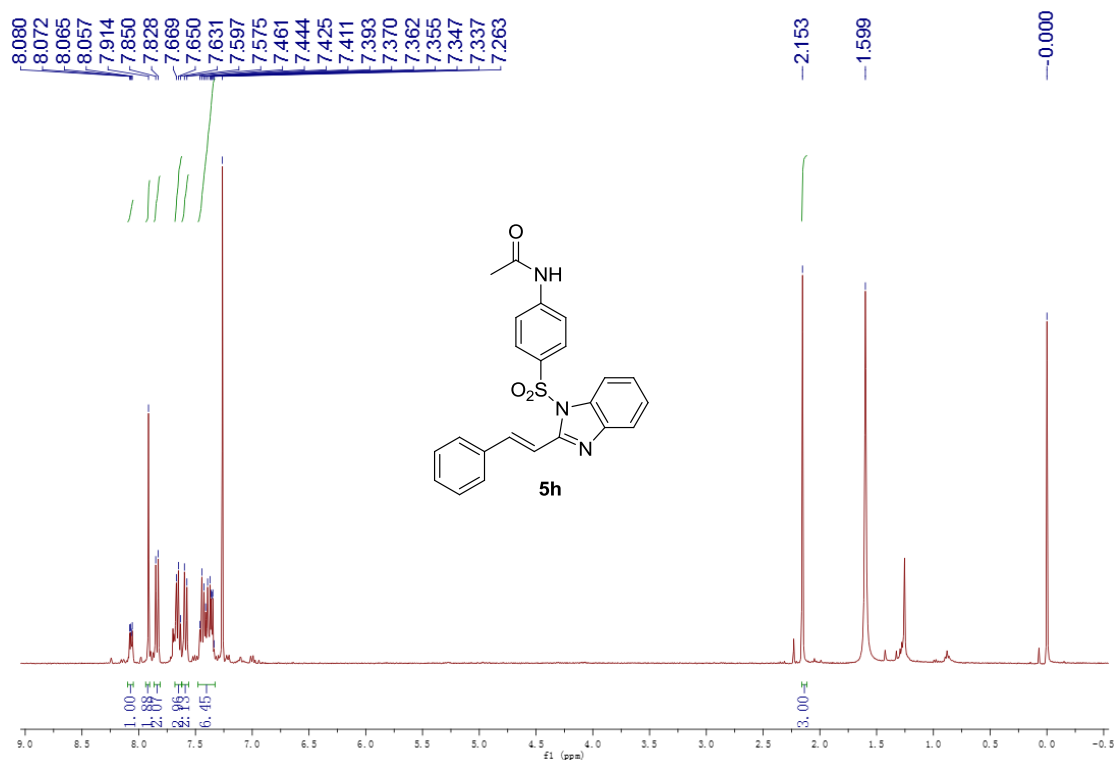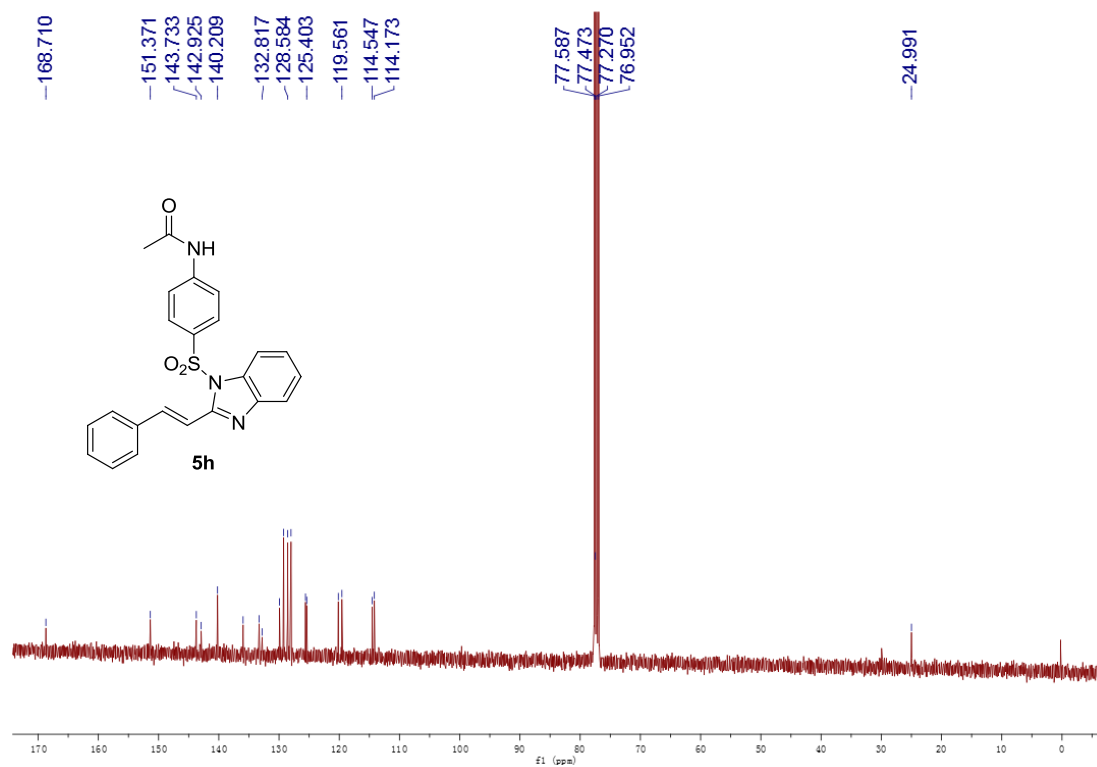

**Figure S27**  $^1\text{H}$  NMR and  $^{13}\text{C}$  NMR of **5i**

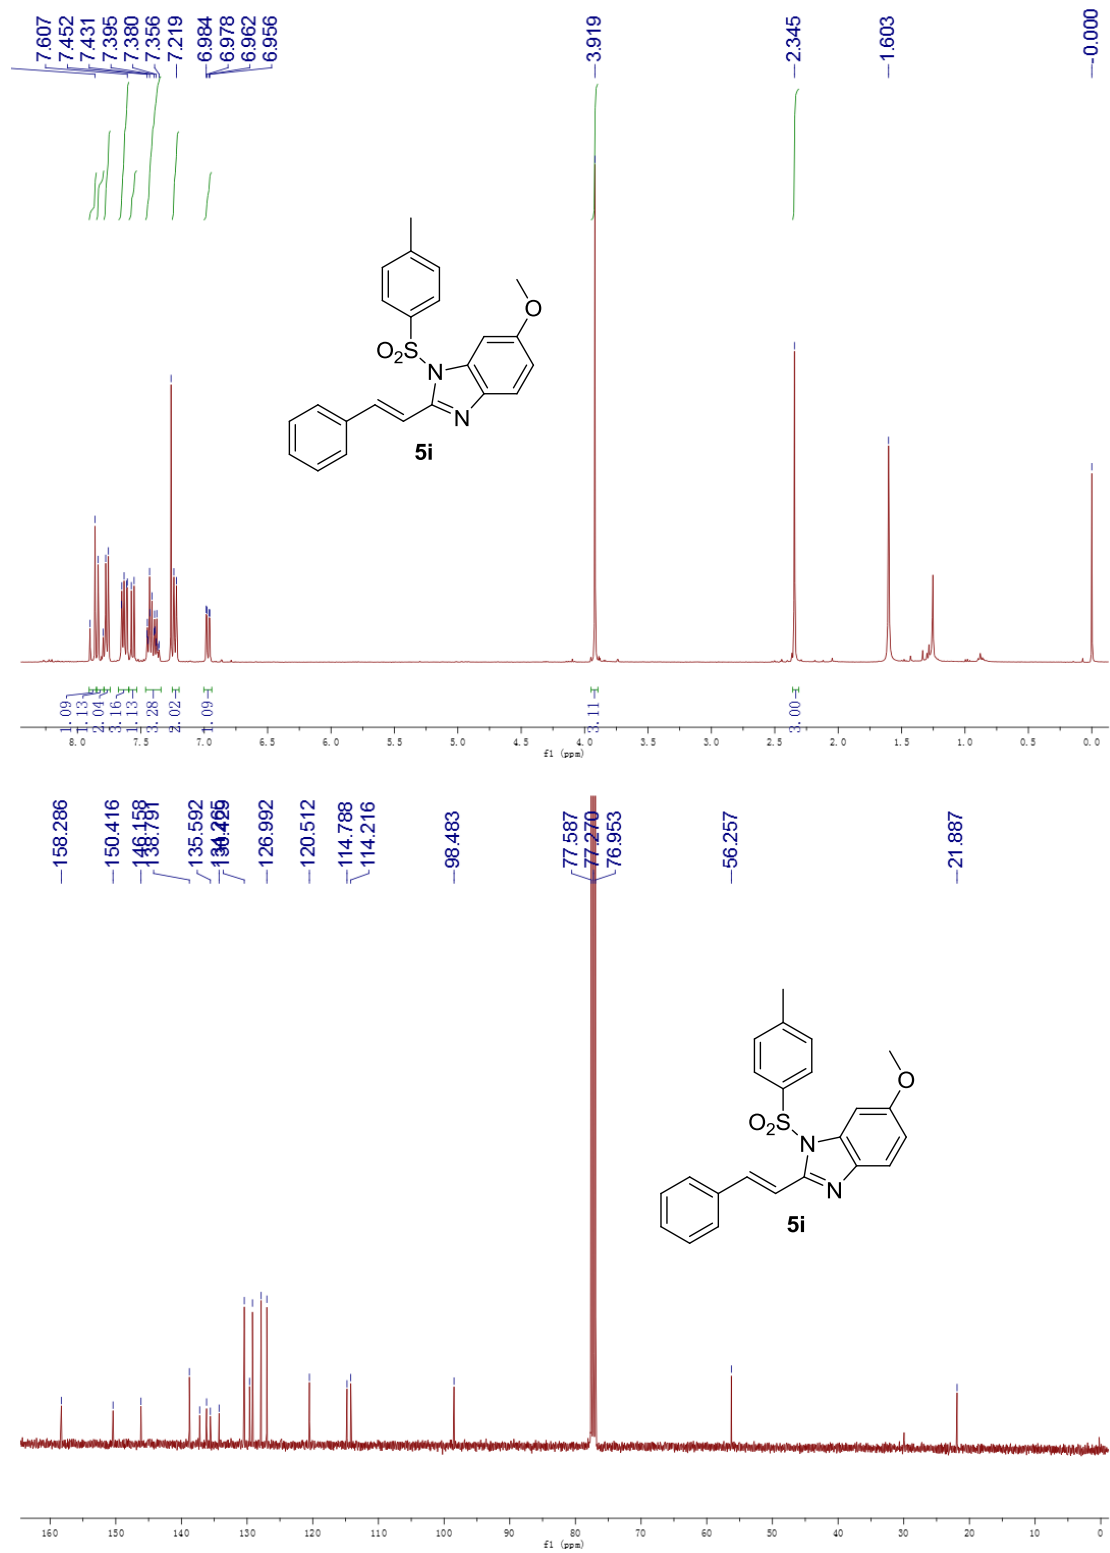

Figure S28  $^1\text{H}$  NMR and  $^{13}\text{C}$  NMR of **5j**

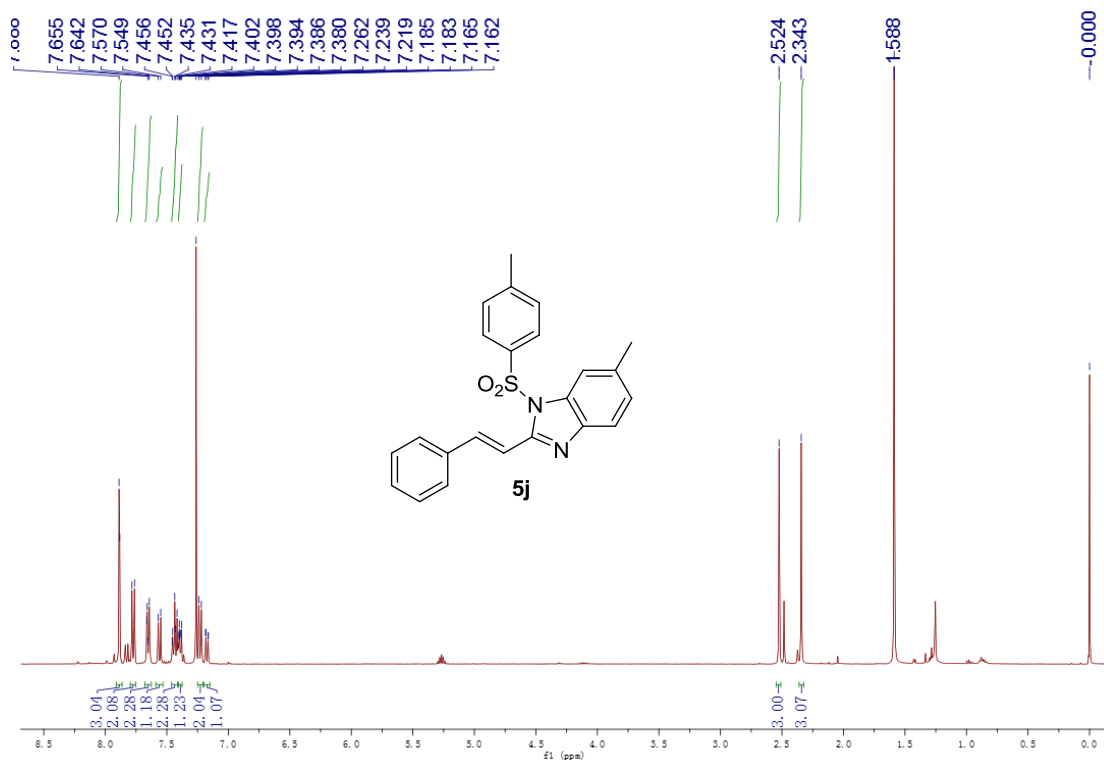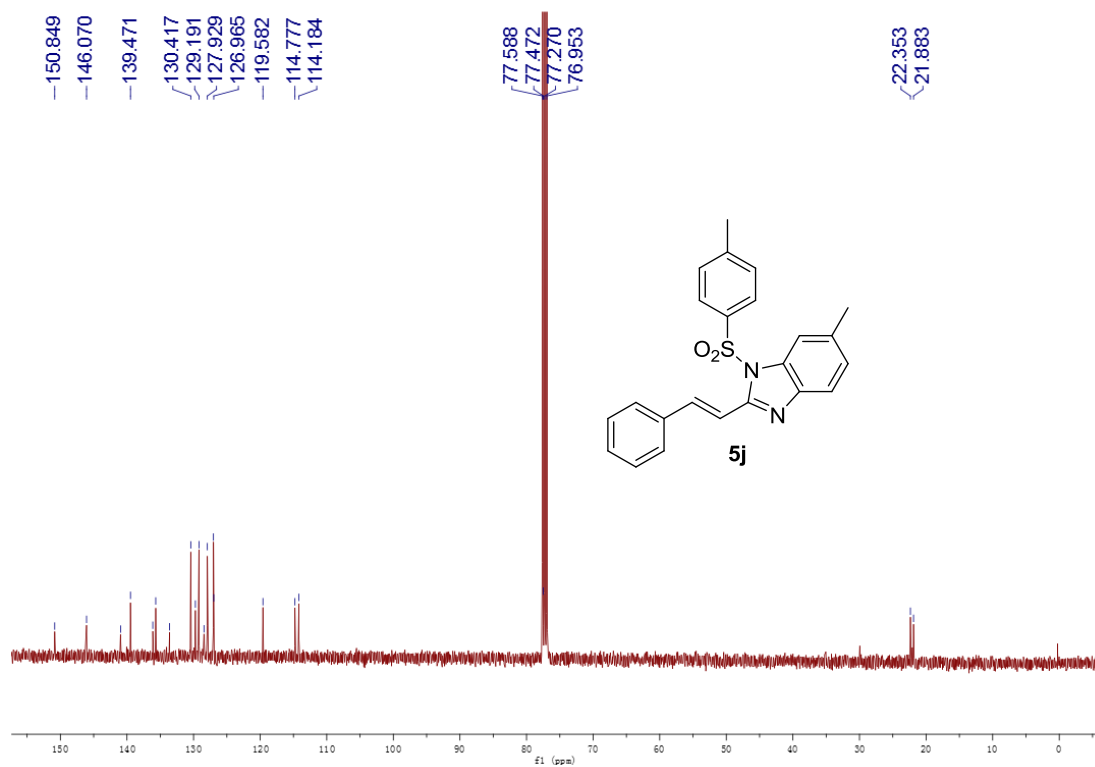

Figure S29  $^1\text{H}$  NMR and  $^{13}\text{C}$  NMR of **5k**

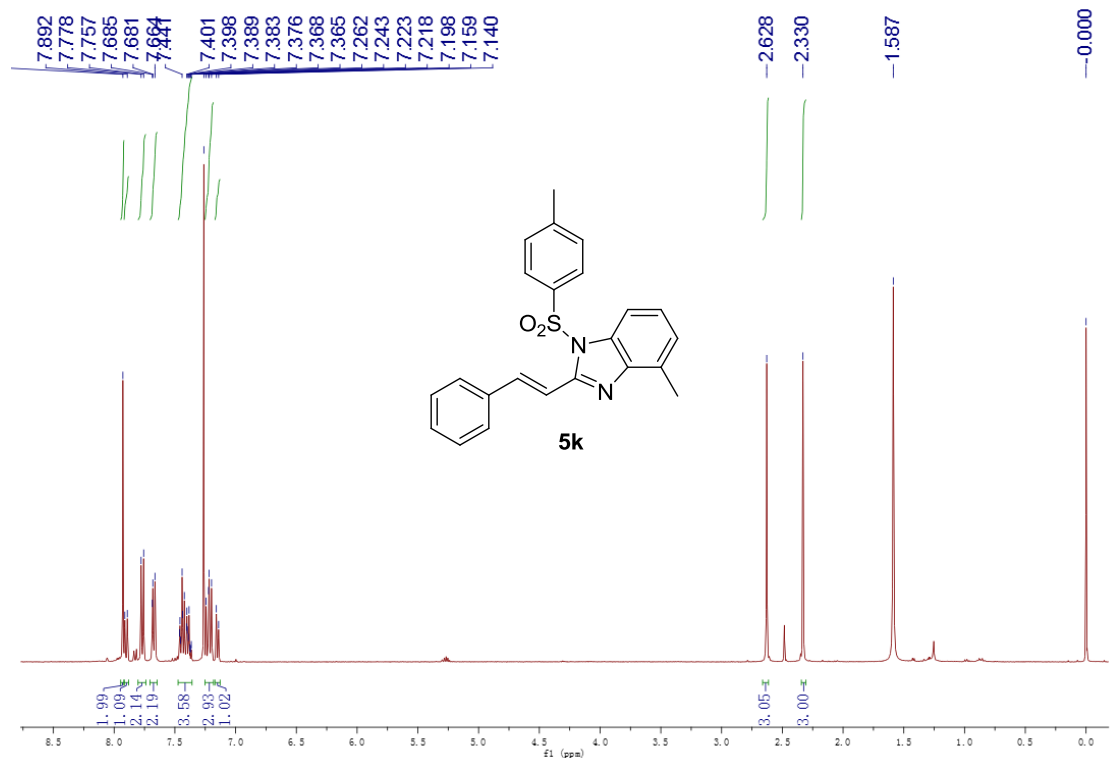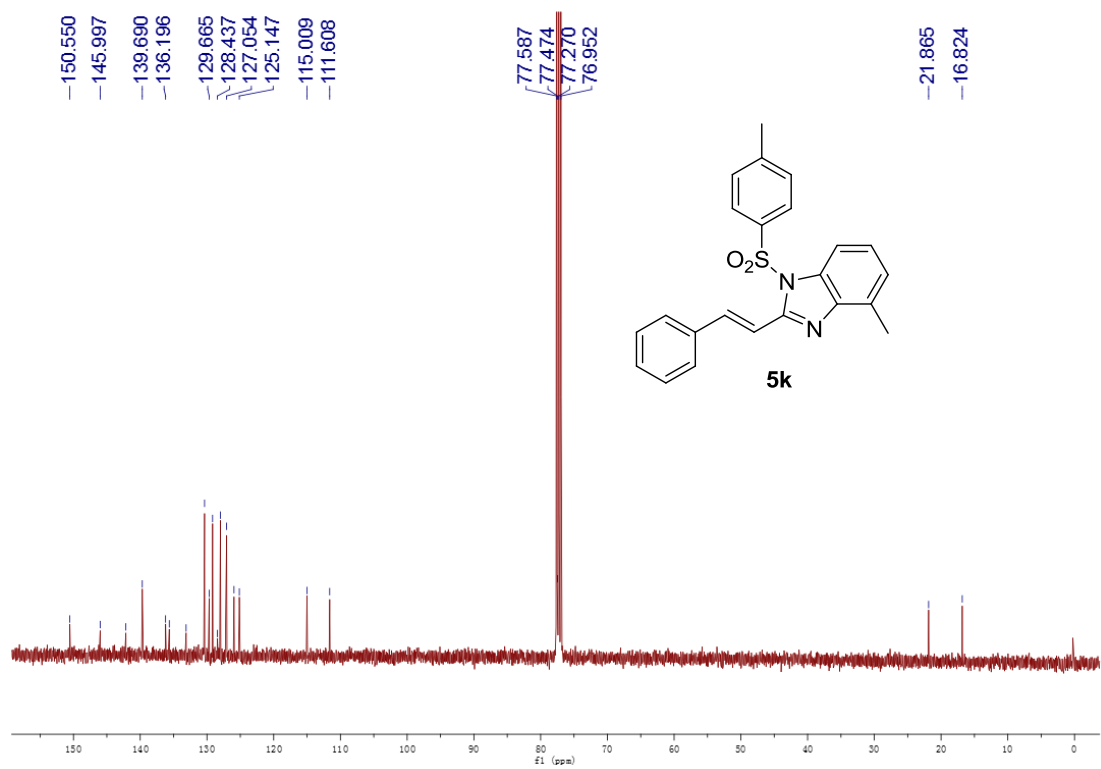

Supplement: c5qo00196j1.pdf [file c5qo00196j1.pdf]
